# Supplementary material
Source: publisher figshare collection journal article supplement (https://brill.figshare.com/ndownloader/files/13726085)
Supplement: Supplementary file 1 [file 13726085]

**Aberdeen Univ.Lib. 205 xiv**

05 Ad Her ff.57-96v

**Admont StiftsBibl. (Bibl. Des Benediktinerstifts) 548 xii**

15 De inv ff.1v-49v

17 Ad Her49v-103v

19 [Ad Her] s-gl

**Admont StiftsBibl. (Bibl. Des Benediktinerstifts) 701 xii-xiii**

23 De inv ff.1-34

25 Ad Her ff.35-94

Glosses on the *Ad Her*?

**Admont StiftsBibl. (Bibl. Des Benediktinerstifts) 759 xiii**

27Ad Her extr (IV 19-41) ff.221-23 (*repetitio* ...)

28 [Ad Her] ex (E) ff.210r-215v (Marbod; *versificaturo quedam tibi tradere curo;* lacks epilogue)

**Agen Bibl. de la Ville 2 xii**

30 De inv ff.1-58v

32 [Ad Her] ta ff.58v-59vb

36 Ad Her ff.59v-105v

38 [Ad Her] s-gl

**Agrigento Bibl.Lucchesiana 4 xv**

42 Ad Her ff.1-84v

**Ajaccio Bibl.Comunale 80 xv**

45 De inv extr f.1v (*virtus est habitus animi nature*)

47 Ad Her extr ff.5v-6 *(separatim. superlatio sumitur* )

49 De inv extr f.8v (*virtus est habitus animi nature moderationi consentaneus*)

50 [De inv / Ad Her] ff.9v-10v anon; *eloquentia est alia copia dicendi sive sapientia alia dicitur)*

51De inv extr f.10 (*religio est quedam … Iustitia est habitus*

52 Ad Her ff.11-89v

53 [Ad Her] comm (E - IV [=V-VI]) ff.90-98v (anon; *nota quod colores verborum aliqui sumuntur proprie, aliqui in proprie*)

55 Ad Her extr ff.122v-129v (*genus cause. demonstrativum. deliberativum. iudiciale*)

57 [Ad Her E] exord ff.130-158v (Barzizza; *nisi persuasum haberem iudices vos ea virtute*)

59 [Ad Her E] exord (vernac) ff.183-187v (Iohannes de Francia; *quamquam magnifice et prudentissime. Primo in genere dubio exordium incipit. consuli la mia mente sia vexata)*

MS also contains Horace *Ars Poetica* with glosses, excerpts from Cassiodorus ‘De rhetorica’, Cicero speeches, *Tusculans* and other rhetorical works, pseudo-Seneca epistles to and from St. Paul, etc.

**Alba Julia Biblioteca Centrala de Stat, Filiala Battyaneum (Bibl. Dioc. Batthyaneum) II.77 xv**

63 [De inv] comm (lacks end) ff.1-53v, 56-78v (Victorinus)

65 [De inv] comm (E - I 24-28) ff.53v-56 (anon*cum sint undecim adtributa*)

67 [Ad Her] comm ff.81-114v (anon, Guillelmus? *etsi negotiis familiaribus. cum Tullius de quinque partibus rethorice se tractaturum promiserat)*

69 [De inv] comm ff.138-225 (anon, Guillelmus? *in primis materia et intentio huius rethoris Ciceronis est querenda. sed quia quidam nescientes differentiam inter oratorem et rhetorem)*

**Amiens Bibl. Munic. 221 xii**

71 Ad Her extr (IV 19-41) ff.221-23 (*repetitio* ...)

72 [Ad Her] ex (E) ff.210r-215v (Marbod; *versificaturo quedam tibi tradere curo;* lacks epilogue and some figures)

**Angers 303 (294) xii**

75 Ad Her extr ff.5v-7v (*repetitio est cum continentur [ab uno] atque eodem verbo* - IV 12.19)

76 [Ad Her] ex (E) ff.5v-7v [Leotta –6r] (Marbod; *versificaturo quedam tibi tradere curo;* lacks epilogue and some figures)

**Angers Bibl.Publique 309 (300) xii**

80 Ad Her extr ff.5v-6 (*repetitio est cum continentur (ab uno) atque eodem verbo)*

81 [Ad Her] ex (E) 5v-6v (Marbod; *versificaturo quedam tibi tradere curo;* lacks epilogue and some figures)

83 **Antwerp: see Anvers**

**Anvers Musaeum Plantin-Moretus M332 (Denucé 122, anc. 4) xv**

85 Ad Her ff.1-74

87 [Ad Her] s-gl ff.1-74

89 [Ad Her] comm (E - IV) ff.74-82v (anon; *repeticio. de exornationibus rhetorice breviter in unum locos aptos*)

**Arras Bibl.Comunale 65 xiii**

95 De inv extr ff.76-76v (*hinc ad rem publicam veniunt plurima commoda* - I 4.5.)

97 Ad Her extr ff.76v-77 (*nichil citius arescit lacrimas* - II 31.50)

Additional MS? Arezzo, Biblioteca della Città 226, xv, Gasparinus Barzizius Exordia In genere dubio inc ‘gaudeo plurimum ac letor in ea te summa est….’

**Arras Bibl.Comunale 466 xiii**

102 De inv extr f.314 (*amicitia est ut ait Tullius in rhetoricis* - II 55.166)

**Ascoli Piceno Bibl.Comunale 198 xv**

105 Ad Her

any glosses?

**Assisi Bibl.Comunale [=Bibl. del Convento di San Francesco] 304 xv**

107 [Ad Her] comm ff.1-80 (Bartolinus; *Justinianus Christianissimus imperator dicit in nomine Domini nostri Jesu Christi)*

**Assisi Bibl.Comunale 309 xv**

112 Ad Her ff.133-74

114 [Ad Her] s-gl

**Assisi Bibl.Comunale 312 xv**

118 [Ad Her] comm ff.1-80 (Bartolinus; *felix qui potuit rerum cognoscere causas; Virgilius secundo Georgicorum; ut ergo felicitate)*

**Assisi Bibl.Comunale 314 xv**

120 Ad Her ff.17-58

**Assisi Bibl.Comunale 690 xv**

122 Ad Her trans/para-ital* ff.266-97 (*advegna he per lo impedimento;* Cox p.158 no.10)

**Augsburg Staats- und Stadtbibl. 2o21 xiv**

125 De inv ff.6v-125v

127 [De inv] s-gl

129 Ad Her ff.56-109v

131 [Ad Her] mi-gl (anon; *est enim otium corporis requies vero animi)*

**Augsburg Staats- und Stadtbibl. 2o22 xv**

136 Ad Her ff.1-94v

138 [Ad Her] comm (incompl) ff.96-171v (anon [Petrus Mitte de Caprariis?] *omnis orator dicitur retor, sed non econverso quia ille qui addiscat)*

**Augsburg Staats- und Stadtbibl. 2o111 xv**

143 Ad Her ff.44-99

145 [Ad Her] s-gl (I-II; Petrus Mitte de Caprariis? *omnis orator dicitur retor, sed non econverso quia ille qui addiscat)*

Augsburg Universitäts-bibliothek Harburg, Schloss (near Donauwörth, Germany), Fürstlich-Oettingen- Wallerstein’sche Bibliothek: see under ‘H’. POKk p.471 advises that the Schloss Harburg collection of MSS went to Augsburg Universitäts-bibliothek in 1980.

**Avignon Bibl.Municipale 357 xv**

150 De inv extr ff.94-96v (*idem in prologo rethoricorum*)

152 Ad Her extr f.96v (*tria sunt genera causarum* - I 2.2)

**Avranches Bibl.Municipale 229**

157 De inv extr ff.1 (fly-leaf), 191-192, 115 (fly-leaf) (*exordiri et ab eo potissimum* - I 17.25-I 19.27, I 30.47-I 31.52, I 33.56-I.35 61, I 47.87-I 49.92)

159 [De inv] s-gl

M-O I p.139

Baltimore Walters Art Gallery

**W 365 xv**

165 Ad Her ff.20-86v

167 [Ad Her] s-gl

**Baltimore Walters Art Gallery**

**W 366 xv**

180 De inv ff.1-82

182 [De inv] s-gl

check glosses on *De inv.*

**Baltimore Walters Art Gallery**

**W 367 xv**

170 Ad Her ff.1-68v

172 [Ad Her] s-gl

174 De inv ff.73-133v

176 [De inv] s-gl

**Baltimore Walters Art Gallery**

**W 368 xv**

187 De inv ff.1-99v

189 [De inv] s-gl

191 [De inv] acc ff.100-100v

**Baltimore Walters Art Gallery**

**W 734 xii**

195 De inv extr f.22r (*virtus est animi habitus* - II 53.159)

**Bamberg Staatliche Bibl. (=SB) Class.13 (M.IV.1) xi**

200 [De inv] comm (E) f.1 (Grillius; *incipientes quamcumque rem scribere, antequam scribamus eam commendare debemus, ut Virgilius)*

**Bamberg SB Class.21 (M.V.6) xii**

205 De inv ff. 1-70v

207 Ad Her ff.81-142v

209 [Ad Her] s-gl

check glosses on *Ad Her*

**Bamberg SB Class.22 (M.V.8) xii**

215 De inv ff.1-19 (*et cum paucos ipse dies* - I 33.55)

217 [De inv] s-gl **xii-xiii**

219 Ad Her ff.19v-44

221 [Ad Her] s-gl **xii-xiii**

**Bamberg SB Class.23 (M.V.9) xiii**

225 De inv ff.1-39v

227 [De inv] s-gl (anon; *prima rethorica que dicitur ei puero elapsa; unde ad eius correcionem secundam scripsit*)

229 Ad Her extr ff.40-53 (*longior esset, trans oceanum* - IV 22.31)

231 [Ad Her] s-gl

233 [De inv, Ad Her] acc. f.53v (anon;. *[?] generalis questio [ ]sis questio inplicita circumstanciis)*

**Bamberg SB Class.24 (M.V.7) xi**

235 [De inv] comm (E) ff.1-42 (Grillius; *incipientes quamcumque rem scribere, antequam scribamus eam)*

237 [De inv] ta f.43

**Bamberg SB Class.25 (M.V.4) xi**

240 De inv ff.2vb-185ra

242 [De inv] comm ff.1ra-185ra (Victorinus)

244 [De inv & comm - Vict.]: s-gl

246 [De inv] comm (E- I 34-41) ff.185rb-189va (anon; *cum sint undecim adtributa personis)*

247 [De inv comm (E - I 34-41)] s-gl

**Bamberg SB Class.29 (M.V.3) x**

251 [Ad Her] ta ff.1v-2v

253 Ad Her ff.2v-62v

255 [Ad Her] s-gl (Odalricus?)

**Bamberg SB Class.92 (M.II.**

**2) xv**

260 De inv extr ff.85-95v

**Barcelona Ripoll Archivo de la Corona de Aragon 42-II xi**

265 [De inv] m-gl ff.71v-95 (Grillius)

267 De inv ff.72-108v

269 [De inv] s-gl

**Barcelona Bibl. Central de la Diputación (= B.Catalunya) 262 xv**

275 Ad Her ff.7r-64v

**Barcelona Bibl. Central 333 xv**

280 Ad Her ff.1-63v

**Basel Öffentliche Bibl. der Univ. (= OBU) AN.IV.8 xv**

285 Ad Her ff.1-83

287 De inv ff.83-168

**Basel OBU AN.IV.9 xii**

292 De inv extr ff.1-12(*- litatem generis -* II 35.107)

294 [De inv] s-gl

296 Ad Her ff.13-59v

298 [Ad Her] s-gl

**Basel OBU B.VIII.11 xv**

305 De inv extr ff.132v-133 (*auctoritates veteris rethorice*)

307 Ad Her extr f.133 (*auctoritates Tulii nove rethorice*)

**Basel OBU C.VI.b.15 xvi**

312 [Ad Her] comm (E - I-II) ff.1-75v (Zasius; *rhetoricen Graeci nominant, quam ex Latinis nonnulli oratoriam || circa prologum libri huius primi ex summa noveritis quod Cicero*)

**Basel OBU C.VI.33 xvi-xvii**

317 [Ad Her] comm (E) (anon; Amerbachiana [Bonifacius Amerbach] s.XVI, II; *tribus orator assequitur modis quod sui est officii: arte, imitatione. exercitatione*)

**Basel OBU F.IV.18 xiii/xiv (c.1300)**

322 [Ad Her] cn ff.21vb-22vb (anon; *differentia est inter rethorem et oratorem quoniam rethor est qui artis precepta tradit, orator qui negocia prosequitur utendo preceptis artis. unde Victorinus. sic describit oratonem: orator est vir bonus)*

**Basel OBU F.IV.32 xii**

327 De inv ff.26v-58v

329 [De inv] s-gl

**Basel OBU F.V.32 xv**

334 [Ad Her] comm ff.2-51v (Guarino da Verona; *solebant maiores in exponendis libris proponere quedam extrinseca et intrinseca // negotium interdum est opera laboriosa nunc vocatur occupatio; familiaribus in rebus amicorum tractandis*)

**Basel OBU F.VII.14 xv**

338 Ad Her extr ff.255-257v (IV; *repetitio est)*

339 [Ad Her] ex (E) (Marbod; *tu mihi dux mihi lux*)

**Basel OBU F.VIII.5 xv**

344 [Ad Her] para/ex ff.285-328 (*tria sunt causarum genera que recipere debet orator et in quibus debet artem persuasoriam applicare: demonstrativum* - I 2.2)

**Basel OBU F.VIII.12 xv**

349 [De inv] comm ff.1-153v (Vict)

351 [De inv] comm (E) ff.153v-58v (anon *cum sint undecim*)

**Basel OBU Inc.705 xv**

[356 Ad Her (incunabulum, 146 fols)]

358 [Ad Her] m-gl (MS - Heynlin von Stein; *totus liber dividitur in prohemium tractatum et epilogum*)

**Belluno Bibl.Com.Lolliana 16 xvi**

363 Ad Her ff.1-144

365: **Benedello Raccolta di Ca' d'Orsolino 495**: See Modena, Fondo Sorbelli 495.

**Bergamo Bibl.Civica Angelo Mai**

**Gamma 2 3 (=MA 224)**

368 Ad Her extr (*tria sunt tempora quibus principio uti non possumus* - I 6.9+)

**Bergamo Bibl.Civ.Ang.Mai**

**Gamma 3 27 (=MA 476) xv**

373 Ad Her ff.1-82v

375 [Ad Her] s-gl (Iohannes Franciscus Fussarius?)

**Bergamo Bibl.Civ.Ang.Mai**

**Gamma 4 16 (=MA 488) xv**

380 Ad Her (101 fols)

382 [Ad Her] s-gl

**Bergamo Bibl.Civ.Ang.Mai**

**Gamma 5 23 (=MA 518) xv**

387 [Ad Her] comm ff.59-79v (anon; *Victorinus ait quis enim audeat profiteri rhetoricen nisi sciat quid sit rhetorica*; first four lines = Ad Her ed. Marx ed. min. p.1, 1-8 cognoscere)

**Bergamo Bibl.Civ. Ang.Mai**

**Delta 4 45 (=MA 277) xii-xiii**

392 Ad Her ff.2-45v

394 [Ad Her] s-gl

**Berlin Deutsche StaatsBibl. (=DSB) Diez B. Sant. 60 xiii-xiv**

399 De inv extr ff.42vb-43rb (*hinc ad rem publicam veniunt* - S5b.12)

401 Ad Her extr f.43rb (*non necesse est si alterum preponas alterum vituperas* - M 64.9-11)

**Berlin DSB frg 84 x**

406 De inv extr ff.1r-2v (I 48.90-I 52.98 and II 14.47-I 18.55; *non potest esse sapiens* - I 48.90)

407 [De inv extr] s-gl

**Berlin DSB Hamilton 161 xv**

411 Ad Her ff.150-219

413 [Ad Her] s-gl

**Berlin DSB Hamilton 175 xv**

418 Ad Her ff.1-75

419 [Ad Her] s-gl

**Berlin DSB Hamilton 176 xv**

423 Ad Her 64 fols

**Berlin DSB Hamilton 177 xv**

428 Ad Her 64 fols

430 [Ad Her] s-gl

**Berlin DSB Phillips 1810 xi**

435 De inv (incompl) ff.1-9v, 13-39v (*foris autem aliquid* I 11.15)

437 [De inv] comm (E) ff.10-12v (anon; *hec de topica Ciceronis sumpta conditionalis syllogismus unde dicitur videtur … Boetius in commento … ad hec respondendum quia Aristotiles loca argumentorum philosophis et oratoribus communia demonstravit* - on De inv 1.41.76; a mini treatise on the topics)

438 [De inv] s-gl

439 [De inv] comm (E) f.13* bis r (Victorinus; *omnis ars duplicem habet faciem secundum preceptum Varronis, aliam extrinsecus aliam intrinsecus* [18 lines, not verbatim as found in Victorinus, but a pastich of phrases/paraphrases from the fourth-century author])

**Berlin DSB Phillips 1811 xii**

444 De inv ff.1-33v

446 [De inv] s-gl

448 Ad Her ff.34-63v

450 [Ad Her] s-gl

452: **Berlin Staaatsbibl. Preussische Kulkturbesitz (=SPK) elect.1002**

See SPK lat.f 98

**Berlin SPK lat.fol. 98 xv**

455 Ad Her 60 fols

457 [Ad Her] s-gl

**Berlin SPK lat.fol. 252 xii**

462 De inv (incompl) ff.43vb-59vb

464 [De inv] s-gl

466 Ad Her ff.59v-81vb

468 [Ad Her] s-gl

**Berlin SPK lat.fol. 345 xv-xvi**

473 Ad Her (incompl) ff.1-46r

475 [Ad Her] mi-gl (anon; *occium est triplex, nobile, ignobile, servile: Cicero libro secundo de oratore*)

**Berlin SPK lat.fol. 371 xv**

479 De inv ff.2-71

481 [De inv] s-gl

**Berlin SPK lat.fol. 557 xv**

486 [Ad Her] ex (E - IV) (Marbod; *tu mihi rex mihi lex mihi lux mihi dux*; lacks some figures, the prose definitions and epilogue)

**Berlin SPK lat.oct. 161 xii**

491 [De inv] comm ff.1v-35vb (Thierry ofChartres; *ut ait Petronius nos magistri in scholis*)

493 [De inv] comm (E - I 41-42) ff.36ra-va (Menegaldus; *adiunctum autem. videndum est quomodo adiuncta negotio valeant*)

495 [Ad Her] comm ff.36vb-75vb (Thierry ofChartres; *circa artem rethoricam hec sunt inquirenda, quid ipsa rethorica sit)*

**Berlin SPK lat.oct. 181 xv**

500 [Ad Her] para ff.59-66 (anon; *ars bene dicendi ex Ciceronis voluminibus extracta: ut in sequentibus latius apparet // exercitacio rethoricorum Ciceronis: omne genus dicendi consistit in demonstrativum* ...)

502 [Ad Her] inaug ff.66-68v (Guarino da Verona; *antequam ad locum et ornatissimum*)

**Berlin SPK lat.oct. 197 xv**

505 [De inv] comm (E) ff.82-3 (Victorinus; *ars est quae significantiam sui plenam non habet* - Halm RLM p.155.24)

507 [De inv] comm (E) f.83 (Donatus [=Victorinus]; *partitio est totius cause per partes constitutio; divisio est rerum sub partitione jacentium* - Halm 208.39-40)

**Berlin SPK lat.quart. 2 xiv**

512 [Ad Her] ex (E) f.124v (Marbod; *versificaturo quedam tibi tradere curo*; lacks some figurse, the prose definitions and the epilogue)

**Berlin SPK lat.quart.7 xvii**

517 [Ad Her] comm ff.1-109 (anon; *prolixitas operis quod explicandum sumpsimus*)

**Berlin SPK lat.quart. 271 xv**

525 De inv ff.1-87

527 Ad Her ff.88-169

529 [Ad Her] s-gl

**Berlin SPK lat.quart. 499 xv**

534 Ad Her ff.1-50v

536 [Ad Her] s-gl (anon; *rethorica dicitur a resis quod est ornatus, est artificiosa eloquentia, est scientia bene dicendi, est scientia apta ad suadendum in causa, est (pre)ceptio que dat certam viam rationem que dicendi est potentia)*

538 [Ad Her E] exord ff.41-61(Barzizza; *exemplum exordii quando habemus dubium genus cause*)

**Berlin SPK lat.quart. 507 xv**

540 [Ad Her] inaug ff.59-60 (Guarino da Verona; *quam liberalis et beneficia natura parens humano precipue generi doctissimi viri et iuvenes ornatissimi mecum sepe numero contemplari soleo* [Müllner p.296])

**Berlin SPK lat.quart. 561 xiv**

543 Ad Her extr ff.33v-36 (*memoria utrum habeat quiddam artificiosi* - III 16.28-24.40)

545 [Ad Her extr] s-gl

**Berlin SPK theol.lat.quart.**

**290 xv (1430-31)**

550 Ad Her extr ff.95-98 (*nunc ad thesaurum inventorum* - III 16.28-24.40)

552 [Ad Her extr] s-gl (anon [Ludolphus Wylkini in Kloster Wynsem?]; *causa efficiens fuit venerabilis Tullus, causa materialis sive subiectum est artificiosa memoria*)

**Bern Burgerbibl. (Stadtbibl, = BB) A 91 20 xii**

557 Ad Her extr ff.1v-2v, 3v (*repetitio* - M 125.8; IV 13.19-IV 42.54)

**Bern BB 161 xiii-xiv**

560 De inv extr ff.75v-76 (*idem in prologo rethoricorum* - from I 1.1, I 14.19, II 56.169 - 163 lines)

561 Ad Her extr f.76v (*tria sunt genera causarum* - I 2 2)

562 [Ad Her] para ff.104-107v (anon; *in primo libro rethorice tractatur de infrascriptis ordine subnotato breviter et summatim)*

**Bern BB 202 xv**

567 Ad Her extr ff.16-20 (*nolle in discrimen* - IV 44-57, M 173.13)

**Bern BB 433 ix**

572 [Ad Her] ta ff.1-2v

576 Ad Her 2v-79 (fols 2v-5r 1.1.1 – 1.7.11; ff.5v-79 *verum hi tres utilitates tametsi* - 1.7.11+)

578 [Ad Her] s-gl

**Bern BB 469 xi-xii**

583 De inv (incompl - I 19.27-II 57.171, with lacuna) ff.53-84 (*-tione dicitur* I 19.27, S24b.23)

585 Ad Her ff.87-131v

587 [Ad Her] s-gl

589 [De inv] comm (E, on I 1-2) ff.131v-134v (Victorinus)

**Bern BB 519 xv**

594 De inv extr (covering I 1.1-I 4.5) ff.8-8v (*cum res ab nostra* - S1b.7)

**Bern BB 520 xv**

598 Ad Her ff.62-152v

600 [Ad Her] s-gl

601 [Ad Her] cn ff.153-157v, 167r (anon; *rhetorica est scientia bene dicendi in civilibus questionibus*)

605 **Blackburn**: see **Whalley**

Bologna Bibl. Com. dell'Archiginnasio

**A 68 xv**

607 Ad Her ff.1-77

608 [Ad Her] s-gl

609 [Ad Her] acc ff.77-78 (Giovanni da Magonza? *queritur in huius operis initio de genere*)

**Bologna, Reale Collegio di Spagna, Bibl. 102 xiv**

611 De inv extr. ff.9rb-21vb (to beg. of II)

**Bologna Bibl. Universitaria (=BU)** 464 (Frati 275) xv

613 Ad Her 83 fols

614 [Ad Her] s-gl

**Bologna BU 1282 (Frati 674) xv**

617 Ad Her 62 fols

619 [Ad Her] mi-gl

**Bologna BU 1283 (Frati 675) xv**

624 Ad Her 100 fols

626 [Ad Her] s-gl (*retthorica est potentia dicendi // orator est vir bonus // ista quattuor genera vocantur accidentalia quia respiciunt principalem [= principaliter?] dicentem vel arrengatem)*

**Bologna BU 2461 (Frati 1256) xiv**

631 Ad Her ff.1-75

633 [Ad Her] m-gl (anon; *negotium triplex est, scilicet yconomicum, politicum et monosticum || Alanus: negotium est laboriosum offitium; studium est duplex, perfectum et inperfectum; philosophia est triplex: realis vel naturalis, moralis et rationalis*

**Bologna BU 2516 (Frati 1292) xiv**

638 Ad Her ff.1-54

640 [Ad Her] s-gl

**Bologna BU 2644 (Frati 1389) xv**

645 Ad Her 59 fols

fol.1r: order colour copy of illus

**Bologna BU 2692 (Frati 1421)**

650 [Ad Her] inaug. ff.92-93 (Guarino da Verona; *quam liberalis* *et benefica* [Müllner p.296])

**Boquen Bibl. de l'abbaye s.n. [MO C.62] xii**

659 De inv extr 11 fols (to I 36.63 and with lacunae)

**Boston Houghton (Harvard Coll., Harvard Uni.) Lib. Lat. 37 xv**

664 Ad Her 104 fols

666 [Ad Her] s-gl

**Boston Houghton (Harvard Coll., Harvard Uni.) Lib. Lat. 174 xv**

671 Ad Her ff.1-109

673 [Ad Her] s-gl

**Bremen Staats u. UnivBibl. c.1+ xv**

678 Ad Her extr (?) ff.7-15

**Brescia Bibl. Civica Queriniana A.V.4 xv**

683 [De inv] comm (incompl - to II 12.40) ff.69v-113v (Petrus Helias; *sicut ordo nostre doctrine exigit ita quoque circa artem rethoricam // proemium premittit, id est, in quo reddit benivolum, attentum et docilem, sicut postea docebitur)*

Contains also rhetorical extracts from Boethius *De diff. top*. , Fortunatianus, pseudo-Augustine, Martianus Capella, and Antoinio di Rho *Practica perbrevis in arte dicendi* ‘[V]ersus velox fit…’, and Cicero, *Partit. Or.* frg.

690 **Breslau: see Wroclaw**

**Brno Státní Vedecka Knihovna (=SVK) A.100 xv**

695 Ad Her (E - IV 1-51) pp.187-224 (*quoniam in hoc libro, Herenni*)

697 [Ad Her] s-gl

699 [Ad Her] acc pp.225-26 (anon; *id est circa questionem circumstanciis implicitam quoniam questionem)*

**Brno SVK Mk 29 xv**

704 [Ad Her E] exord ff.125-130v (Barzizza; *exemplum exordii quando habemus dubium genus cause* )

707 **Bruges: see Brugge**

**Brugge Bibl. de la Ville 552 xi-xii**

709 De inv ff.1-51

711 [De inv] s-gl

713 [De inv] comm (E - I 24) ff.51-52v (Grillius? [P.Courcelle 'Pages inédites de Grillius sur le *De inventione' Rev. de Philologie* 29 (1955) 34-38); Menegaldus? (Ward) *si tam agentis persone quam rei geste*)

715 Ad Her f.52v-96v

717 [Ad Her] s-gl

**Brugge Bibl. de la V. 553 xiv**

722 [De inv] comm (E) ff.1ra-39ra (anon Guillelmus? *sepe. daturus precepta de eloquentia quia videbat*)

727 **Brussels: see Bruxelles**

**Bibliothèque Royale (=BR) 4045 xi**

732 Ad Her ff.1-41v

734 [Ad Her] s-gl

**Bruxelles BR 5346-5347 xi**

739 [De inv] comm ff.8-52v, 56-77 (Victorinus)

741 [De inv] comm (E) (anon *cum sint undecim adtributa*.)

**Bruxelles BR 5348-52 xi**

745 [Ad Her] n (def)s f.1v (anon; *apologus est quando aliquid ad exemplum humane vite inducitur ut de rustico et urbano mure* - M8.4; S23b.2)

746 [Ad Her] ta ff.2ra-vb (*de officio oratoris*)

748 Ad Her ff.2-32

750 [Ad Her] s-gl

752 De inv ff.33-63v

754 [De inv] s-gl

756 [De inv] comm (E) ff.64-79 (Grillius; *incipientes quamcumque rem scribere, antequam scribamus eam commendare debemus, ut Virgilius // [saepe et multum] consuetudo est oratorum ut in principio omnia que videntur gravia*)

**Bruxelles BR 9998-9999 xii**

761 [De inv] n f.1v (anon; *quis, quid, ubi, quibus auxiliis, cur, quomodo, quando* - Halm.207)

763 De inv ff.2-45v

765 Ad Her ff.45v-89

**Bruxelles BR 10006 xii-xiii**

770 De inv (incompl - ends S141b.17) 31 fols

772 [De inv] s-gl

**Bruxelles BR 10057-62 xii**

777 [De inv] comm ff.2-30va (Thierry of Chartres; *ut ait Petronius nos magistri in scholis // circa artem rethoricam decem sunt consideranda quid sit genus // sepe et multum hoc mecum cogitavit: studendum esse arti rethorice Tullius intendit persuadere* )

779 [De inv] comm (E) ff.30v-31r (Thierry of Chartres; *ut ait Petronius nos magistri in scholis )*

**Bruxelles BR 15559 xiii**

784 De inv ff.2v-53v

786 [De inv] s-gl (anon; *societas est spontanea aliquorum coniunctio ad*)

788 Ad Her ff.56-107v

790 [Ad Her] s-gl (*negotium publicum ad omnes commune ad omnes unius civitatis privatum sive familiare ad propria familiaria*)

**Bruxelles BR IV.171 xv**

795 Ad Her (incompl - II 36.21 to end) 52 fols (*estque non necessariam causam*)

797 [Ad Her] s-gl

**Budapest Egyetemi Könyvtar**

**(= University Library = EK) lat. 20 xiv**

803 Ad Her extr ff.(80) - 82v (III 11-19)

805 [Ad Her -extr] s-gl

**Budapest Országos Széchenyi Könyvtar (= National Museum Library, =OSZK) Clmae 36 xv**

810 [Ad Her] comm (E - I 1) f.2v (anon *etsi in negociis. Nota ista: proemium potest dividi dupliciter*)

812 Ad Her ff.3-102

814 [Ad Her] s-gl

818 [Ad Her] ex (E) ff.102-106 (Marbod; *versificaturo quedam tibi tradere curo;* lacks the definitions in prose)

**Budapest OSZK Clmae 149 xv**

823 Ad Her ff.1-55v

825 [Ad Her] m-gl

**Budapest OSZK Clmae 370 xv**

830 [De inv] comm ff.1-65, 68v-94v (Victorinus)

832 [De inv] comm (E) ff.66-68 (anon *cum sint undecim adtributa)*

**Burgo de Osma Bibl. de la Catedral 7 xii**

837 De inv ff.1-30v

839 [De inv] cn ff.1r and 30v (*ars rectorica*)

any glosses?

Colocsa (Hungary): see Kalocsa

**Cambridge Corpus Christi College 158 (formerly O.28) xv**

844 De inv ff.1-72

846 Ad Her ff.73-136

**Cambridge Fitzwilliam Museum 357 xv**

851 [Ad Her] comm (E - III 16.28-24.40 [mem.].) 13 fols (anon; *quartus decimus liber Marci Tulii Ciceronis rethorice nove. Qui tradit memorativam artem. Unicum habet tractatum. viiij capitula continentem. Capitulum primum quid per memoriam hic debeat intelligi* // *cum res ac dispositionem ac modum)eas loquendi excogitavimus antequam audeamus ipsas proferre)*

**Cambridge Gonville and Gaius College (=G&G) 230/116 xv**

858 [Ad Her] ex (E) ff.170r-v (Marbod; *versificaturo quedam tibi tradere curo;* lacks somefigures, the prose definitions and the epilogue)

**Cambridge G&G 249/277 xv**

863 Ad Her ff.134-150v

865 De inv ff.184-190

**Cambridge G&G 305/372 xiii-xiv**

870 De inv cn f.415v (anon *sicut dicit Tullius libro primo rethorice principium est oratio perspicue*

**Cambridge G&G 488/484 xv**

875 [Ad Her] comm (incompl) 87 fols (anon *intuenti et inspectanti michi prorsus nulla res videtur // familiaribus, i.e. amicis, quamquam nonnulli dicant tres esse partes philosophie*

Suzanne Reynolds writes to me asking for identification of this MS. She describes it as having a prologue which addresses one Pelegrinus several times, and begins ‘Intuenti et inspectanti michi prorsus mala res utilior quam dicendi vis atque facultas quedam admirabile…’ It ends on fol. 2r ‘…die nunnunquam faciebat de prohemio satis’. Bk 1 begins ‘Oratoris officium finite exordio incipit tractatus in quo….’ Bk 4 ends incomplete on f.66r ‘… ponebatur in hoc pectora et pulmones pro pectore et pulmone’. The next two pages are blank but rtuled by the original scribe The MS is Flemish, 3rd quarter, fifteenth century.

**Cambridge Pembroke College**

**85 III xii**

880 [De inv] comm ff.84-99 (Petrus Helias; *sicut ordo nostre doctrine exigit ita quoque circa artem rethoricam // proemium premittit, id est, in quo reddit benivolum, attentum et docilem, sicut postea docebitur*)

**Cambridge Pembroke College**

**87 xiii-xiv**

885 De inv extr ff.109v-121

887 Ad Her extr ff. -121

**Cambridge Peterhouse Coll.**

**248 II xi**

892 De inv ff.1v-31v

894 [De inv] mi-gl

896 Ad Her ff.33v-63

898 [Ad Her] mi-gl

900 [Ad Her] ta ff.63r-v

See now Thomson (2016)

**Cambridge St John's College**

**100 xiii**

905 De inv ff.1-30

906 [De inv] s-gl

See Thomson (2013) pp.162-66; French, c.1200 A.D. A mammoth volume with numerous contents, dialectic, Aristotle, Walter Burley Richard Sbirwood etc. (many items later than date of original volume)

**Cambridge Trinity Coll. 1112 xv**

910 De inv ff.1-82

912 [De inv] comm (E – on *De inv* 1.17.24 24) (Menegaldus? *si tam agentis*)

**Cambridge Univ.Lib. Ii.6.6 xii**

917 De inv ff.1-41v

919 Ad Her ff.47-88

**Cambridge Univ.Lib.**

**Add.3391 xiii**

924 Ad Her extr (IV 19-41) ff.1-3v

926 [Ad Her] ex (E) f.1-3v (Marbod; *versificaturo quedam tibi tradere curo*)

**Camerino Bibl.Valent. 30 xv**

931 Ad Her 92 fols

**Cardiff Central (Public) Lib. 2.801 xv**

936 Ad Her ff.5-111

938 [Ad Her] mi-gl (anon. *rectoricha dicitur a retos que est dulce et ycos que est scientia id est dulcis scientia vel dicitur a resis que est ornatus et ycos que est scientia quasi ornata scientia // quid est rectorica? est sententia dicendi unumquodque genus persuasibile vel est scientia loquendi apposite vel artificiose ad persuadendum)*

**Cardiff Central (Public) Lib. 4.333 xv**

943 De inv 54 fols

945 [De inv] mi-gl

**Carpentras Bibl. Inguimbertine 13 (L.14) - II xii**

950 De inv (incompl) ff.64-87v

952 [De inv] s-gl *(scientia, inspectiva, actualis // retoricorum cum ambo esse dictum in obscurum)*

**Cesena Bibl. Com. Malatestiana S.XVIII.5 xv**

957 De inv ff.1-50

959 Ad Her ff.50-96

**Chantilly (Château) Bibl. du Musée Condé 590 / 433 (XX DI 3) xiii**

963 [De inv / Ad Her] ta (fren*) ff.1ra-5vb (Jean d'Antioch; *ci comense rectorique de Marc. Tulles Cyceron, laquel Maistre Johan d'Anthioche translata de Latin en Romans a la requeste de frere Guillaume frere de l'ospital de Saint Johan de Jerusalem l'an de l'incarnation M et CCC.LXXXII [=M CC LXXXII]*)

964 [De inv] acc (fren*) ff.6v-12v (Jean d'Antioch; *ci comense le prologue que maistre Johan translateor de rettorique fist // tout bien tres bon et toute grace parfaite s'en vient dou soverain père de clartez verai deu tout povissant sires pardurable sanz comensement et sanz fin*

966 De inv trans-fr ff.13-85va (Jean d'Antioch; *ci comense rettorique de Marc. T. Cyceron, laquel Maistre Johan d'Anthioche translata de Latin en Romans a la requeste de frere G. de l'ospital de Saint Johan de Jerusalem l'an de l'incarnation M CC.LXXXII // mout ait ce pence et sovent se l'abonda(n)ce de parler et le soverain estude d'eloquence ait plus fait de mal ou de bien)*

968 Ad Her trans-fren* .85vb-160vb (Jean d'Antioch; *ci comense le tiers livrè qui est apele Rettorique nove leque(l) Cyceron fist a Herenni LXXVI // ja soit ce, o Herenni, que nos soyons si empeschiez en noz besoignes familieres)*

970 [Ad Her] epil (fren*) ff.160vb-161rb (Jean d'Antioch; *ci devise le translateor II raisons por coi il tint l'ordre et le proces don traitier que l'autor porsiut CCV [= ch.no.] // ici fenist le sizeime livre et le darain de toute la rethorique de Marc Tulles Cyceroni, qui est translatee dou latin en francois selonc lordenance et selonc le proces dou tratter porsiut car ceste translacion si contient enterinement cele meisme maniere de tratter qui est faite et disposee par l'auctour au plus pres quele peut. Et ce fu fait nomeement por ii raisons)*

972 [De inv / Ad Her] epil (fren*) ff.161va-164rb (Jean d'Antioch; *ici parole de l'argumentacion de logique por faire la conoistre a ceaus qui cele science ne peuent savoir CCVI*)

**Chartres Bibl.Mun. 99 (80)+ x-xi**

975 [De inv] comm ff.1-95 (Victorinus)

977 De inv ff.2-95

979 [De inv] comm (E) ff.95-96v (anon *cum sint undecim adtributa)*

**Chartres Bibl.Mun. 216+ xii**

984 De inv ff.9-68

986 Ad Her ff.68v-117v

Correct / check assignment in survey ch. 4(a)

**Chartres Bibl.Mun. 497+ xii**

990 De inv ff.191rb-209vb and 220ra- 229vb

992 Ad Her ff.230ra-257ra

Correct / check assignment in survey ch. 4(a)

**Chiari Bibl. Morcelliana 4 xv (1470)**

997 Ad Her ff.1- ("le carte non sono numerate"; title: ‘Rethoricae liber explicit per me pecinum de bigonis [=Pecino Bigoni] de claris eo [?] tempore quo saturnalia carnis privii celebrantur: die tercio nonis marcii Verone moratur [?] in domo doni danielis de bivilaquis de lazizio suburbio [?] sancti steffani 1470’)

**Cluj Bibl. Filialei Cluj-Napoca a Academiei Romane Cod. lat. 5 xv-xvi (c.1500?)**

1002 De inv. ff.29-101v

1003 [De inv] comm. ff.97-164v (Victorinus)

1004 [De inv] comm. (E) ff.164v-166v (anon. *cum sint undecim adtributa)*

**Colmar Bibl.Mun. 375 (ms.15) xii**

1007 [De inv] acc ff.1-1v (Quintilian ['exceptum de Cuintiliano': MO I p.132, Q. *Inst.Or*. 2.15.13] *rhetorica est secundum Aristotelem et Patroclem ius inueniendi omnia in oratione)*

1009 De inv ff.1v-52v

1011[De inv] s-gl

1013 Ad Her ff.52v-100

1015 [Ad Her] s-gl

**Colmar Bibl.mun. 376 - IV (ms.19) xv**

1020 Ad Her f.165-204

1022 [Ad Her] s-gl

1024 [Ad Her] epil (?) f.204v (anon *pro exordio introducendo.* *Boethius de consolatione philosophie in prima prosa primi libri refert se a philosophia Eleatici* *atque achademicis studiis inutritrum*)

A rhetorical miscellany, containing Gasparinus Pergamensis ‘tractatus de rethorica’cum omnis commode et perfecte eloquutionis preceptio….; speeches of Cicero, Cornelius Scipio, Gaius Flaminius, Matheus de Ugutionibus de Trivixio, Franciscus Philerphus, Guinifortis Barzizius, Baltasar Rasinus, letters to and from Guarino Veronensis and much else.

# Cologne: see Köln

1029 **Cologny-Geneva:** see **Geneva-Cologny**.

1034 **Copenhagen:** see **Kobenhavn.**

1039 **Cornell University Library:** see **Ithaca (N.Y.)**

1044: **Cracow:** see **Krakow.**

**Cremona Bibl.Governativa 67 xvii**

1049 [Ad Her] comm ff.1-59v (anon *maxime profecto benignissimo Deo a quo bona sunt omnia // docent artis scriptores illud in principio cuiuscumque orationis)*

**Cremona Bibl.Governativa 125 xv**

1054 [Ad Her] comm 98 fols (Alanus; *omnium artium doctrinam duplicem esse secundum preceptum sententiamque Varronis Victorino teste // tractaturus Tullius doctrinam rethorice artis integram atque perfectam prohemium premittit*)

1059 **Cues**: see **Kues**

1061 **Cusa**: see **Kues**

1063 **Cusanus**: see **Kues**

1068 **Danzig**: see **Gdansk**

**Darmstadt Hessische Landes- und Hochschulbibl. 1428 xv**

1073 De inv ff.1ra-29vb

1075 [De inv] s-gl

**Darmstadt Hessische Landes- und Hochschulbibl. 2283 xii**

1080 De inv ff.1v-38

1082 Ad Her ff.38-72v

**Den Haaq: see s’Gravenhage**

**Deventer Stads- of Athenaeumbibliotheek I,87 (101 F 23 KL) xii**

1087 De inv ff. 1-108 (MO III 2 p.22)

**Deventer S- of A-bibl. I,86 (101 F 22 KL) xii**

1089 Ad Her ff. 1-112 (MO III 2 p.22)

**Dijon Bibl.Mun. 481 xv**

1094 Ad Her ff.1-55v

1096 [Ad Her] epil f.56 (Polydorus Vergilius; *postquam deprehensum est in dicendo alia utilia, alia inutilia esse*)

**Donaueschingen Fürstlich Fürstenbergischen Hofbibl. 12 xv**

1104 [Ad Her] comm (incompl) 81 fols (Guarino da Verona; *in exponendis libris tria potissimum premitti solent. auctoris vita // coniunctio que convenientius cum subiunctivi modi verbo modo coniungitur)*

**Douai Bibl.Mun. 532 xii**

1109 De inv extr ff.192-193v (I 1.1-I 4.5)

**Dresden Sächsische Landesbibl.**

**Dc 107 xii**

1114 Ad Her ff.1-48v

1116 [Ad Her] s-gl

1118 De inv ff.50-94v

1120 [De inv] s-gl

**Dresden Sächsische Landesbibl. Dc 111 xiv**

1125 De inv ff.180-219

1127 [De inv] s-gl (anon; *rhetorica vetus. hic studium accip[ ] sit vehemens [ ] ad aliquid peragendum. calamitas tunc proprie … [edges cropped])*

1129 Ad Her ff.220-251

1131 [Ad Her] s-gl (anon; *etsi: pro quamvis; negociis: excusat; familiaribus: i.e. domesticis) [=IL] // impeditum est proprie pedibu[s] // Quintiliani hec est definitio // orator est vir bonus dicendi peritus qui in rebus publicis et privatis plena et perfecta utitur eloquentia // ipse autor tractat [ ] et duo facit primo ponit [ ] tractorum et secundo ponit tracta[ ]tibus (?) ibi secunda nunc tempus (?) postulat [minor gloss for fols 236v-238r, then slight and in other hands])*

1133 [De inv] comm (E) ff.251v-252r (Menegaldus? *Marcus Tullius Cicero ad Erennium. Tam agentis persone quam geste rei turpitudine [si] tam agentis)*

**Dublin Trinity Coll.Lib. 359 (D.1.17) xiv**

1138 Ad Her

**Dublin Trinity Coll.Lib. 927 (D.3.36) xi**

1143 De inv (incompl) - ff.1-128v (*bestiis* - I 4.5))

1145 [De inv] s-gl

**Dublin Trinity Coll.Lib.**

**632 (=1704, E.5.20) xv**

1147 De inv / Ad Her extr ff.122r-v ('ex Tullio in rethorica')

**Durham Dean and Chapter Lib.**

**(= Cath.Lib.) C.IV.5 xii**

1150 De inv ff.1-76

1152 Ad Her ff.77-144

**Durham Dean and Chapter Lib.**

**(= Cath.Lib.) C.IV.7-I xii**

1157 [De inv] comm ff.2ra-30vb (Guillelmus? *in primis materia et intentio huius rethoris, scilicet Ciceronis, querenda est sed quia quidam nescientes differentiam inter orationem et rethorem, materiam et intentionem oratoris rhetori attribuunt // sepe. daturus precepta eloquentie quia videbat eam in maximo odio habitam culpa multorum)*

1159 [Ad Her] comm ff.30vb-41vb (Guillelmus? *etsi familiaribus. cum Tullius de quinque partibus rethorice se tractaturum promiserat)*

**Durham Dean and Chapter Lib.**

**(= Cath.Lib.) C.IV.29 xii**

1164 [De inv] comm ff.196ra-215va (Guillelmus? *G. materia Tullii est in hoc opere rethorica i.e. artificiosa eloquentia non tamen in essentia sua accepta*)

**Durham (North Carolina) Duke Uni.Lib. Latin 95 xv**

1169 De inv (incompl) 93 fols.[acc.to letter from Librarian 10/12/1996; 83 acc.to (Duke U.L.) *Library Notes* 47:1977 p.28]

**Edinburgh National Lib. of Scotland Acc.9193/1 xii**

1174 De inv ff.1-63v

1176 [De inv] s-gl

1178 Ad Her ff.63v-125

1180 [Ad Her] s-gl

**Eichstätt Univbibl. St 633 (formerly 4o88) xv**

1183 [Ad Her] ex (E) f.40-41 (Marbod; *tu mihi lex, mihi rex*; lacks some figures, the prose definitions, the epilogue; Leotta *xxxv)*

check / correct assignment in ch. 4(a)

**Einsiedeln Stiftsbibl. 307 xv**

1185 De inv pp.323-427

1187 [De inv] mi-gl

1189 Ad Her pp.427-525

1191 [Ad Her] mi-gl

Engelberg Stiftsbibl. 154 xii

1196 De inv ff.1v-125

**Erfurt Wissenschaftliche Bibliothek der Stadt (Wissenschaftliche Allgemeinbibl.) Amplon. Oct. 8 xii**

1201 Ad Her extr (IV 19-41) ff.113va-114v

1203 [Ad Her] ex (E) ff.113va-114v (Marbod; *versificaturo quedam tibi tradere curo;* lacks epilogue)

**Erfurt Wissenshaftliche Bibliothek der Stadt Q71 xiii**

1208 [De inv] comm ff.42-115 (Petrus Helias; *sicut ordo nostre doctrine exigit ita quoque circa artem rethoricam // proemium premittit, id est, in quo reddit benivolum, attentum et docilem, sicut postea docebitur)*

**Erfurt Wissenshaftliche Bibliothek der Stadt Q75 xiii**

1213 [De inv] comm ff.1-41 (Petrus Helias; *sicut ordo nostre doctrine exigit ita quoque circa artem rethoricam || proemium premittit, id est, in quo reddit benivolum, attentum et docilem, sicut postea docebitur)*

**Erlangen-Nürnberg Universitätsbibl. 382 [Irm 305 (Ac. VIII.33 - a.6.m)] xi**

1216 [De inv] comm (E - I 13.18?) 'am einband' (anon; *cuius discussio in ratione consistit hoc modo: Orestes excusans se matricidii. iure fecisse [ ] dicit quod illa patrem suum excidit. ratio est quia illa Agamenonem occidit)*

1217 [De inv] acc f.1 (anon; *ars oratoria que s[ecundum] Tullium l[ibrum] II officiorum finitime ponitur civili sapientie*.  *apud eundem i.e. rethorica pars eius dicitur esse. nam nec sentit cum eis qui civilem scientiam eloquentie putant non indigere. et ab hiis qui putant eam omnem rethoris vi contineri magnopere dissentit. versatur autem circa controversias in dicendo positas cum personarum certarum interpositione ea vero que philosophice speculationi conceduntur ut summi boni investigatio...*)

1218 De inv ff.1v-55v

1220 [De inv] mi-gl (anon; *quia veritas secreto melius investigatur ne publicaretur temere)*.

**Erlangen-Nürnberg Universitätsbibl. 383 [Irm.290 (Altd.m.54)] xii**

1225 De inv ff.2-49

1227 [De inv] s-gl

1229 Ad Her ff.49v-90v

1231 [Ad Her] s-gl

**Erlangen-Nürnberg Universitätsbibl. 426-III [Irm.289 (Ac.x.17-H.m.298)] xii**

1236 Ad Her ff.120-187v

1238 [Ad Her] s-gl

**Erlangen-Nürnberg Universitätsbibl. 619 [Irm.850 (Gc IV.53)] xv (1457)**

1243 [De inv] acc I f.1 (anon; *nam confirmationis et confutacionis causae que sunt argumenti*)

1245 [De inv] acc II f.2r (anon; *interest inter rethorem, sophistam, oratorem. rethor est qui docet litteras atque artes* [= Victorinus ed. Halm 156.23])

1247 De inv ff.2v-40

1249 [De inv] s-gl (anon; *M.T.Ciceronis rethoricorum liber primus incipit)*

1251 [Ad Her] acc ff.51r-v (Johannes Seiler? *iste est liber rethorice nove Marci Tullii Ciceronis scriptus ad Gayum Herennium in quo et dividitur in prohemium et in tractatum // rethorica est scientia dicendi apposite ad persuasionem)*

1253 Ad Her ff.52-126

1255 [Ad Her] mi-gl (Johannes Seiler; *iste est liber rethorice nove Marci Tullii Cyceronis scriptus ad Gayum Herennium in quo traduntur artis rethorice precepta et prima sui divisione dividitur in prohemium et tractatum. tractatus incipit ibi oratoris officium. prohemium dividitur in tres scilicet partes quia*)

1257 [Ad Her] epil ff.126v-128v(Johannes Seiler; *he sunt attributa persone: nomen*, natura, *victus, fortuna, habitus, affectio, studia consilia, facta casus orationis. nomen est ..*.[De inv. I 24, 25 etc])

1259 [Ad Her] cn ff.129ra-131va (Johannes Seiler; *circa colores verborum et sentenciarum* *per ordinem. est primo notandum quod circa quemlibet colorem novem sunt consideranda // quedam dicta super quartum librum Tully et principaliter circa colores quoniam preter pauca tractat)*

1261 [Ad Her] acc ff.131vb-132ra (Johannes Seiler *circa inicium rethorice moventur questiones: queritur quid sit rethorica dicendum secundum Ysidorum in secundo ethymologarum rethorica est benedicendi scientia in civilibus questionibus ad persuadendum iusta et bona)*

**Erlangen-Nürnberg Universitätsbibl. 635 xv**

1266 Ad Her ff.381-415

1268 [Ad Her] mi-gl (Guarino da Verona? *solebant maiores in exponendis libris multum inquirere que nunc obmittuntur. dicitur nova ad differentiam veteris quam in adolescencia scripsit, de qua in oratore ait qui libri a nobis exciderunt, quamque multi dicant. titulus libri talis Marcij Tulij Ciceronis rethorice nove ad Herennium liber primus incipit*)

**Erlangen-Nürnberg Universitätsbibl. 636 [Irm. 700. (Bc.VI.5 - H.ch.95)] xv**

1273 [Ad Her] cn ff.281-282v (anon; *Tulii nova rethorica incipit: etsi in negociis familiaribus impediti vix ocium studio suppeditare possimus et id ipsum quod datur ocii libentius in philosophia consumere consuevimus: inter negocium et occium laboriosa negans ocium. inter ocium et cessatio[nem] ab administratione secularium causa studii)*

**Escorial, El: Bibl. del Monasterio de San Lorenzo (Realbibl.) [= Escorial] a IV 25 xv**

1282 [Ad Her] comm (E - I 2, II 28, IV 55) ff.87r, 91r-92v (anon; *nunc quas res oratorem habere etc*  [= I 2].  *posteaquam Ci[cero] de genere artis, de materia, officio et fine dixit // argumentatio etc*  [=II 28]. *ea est absolutissima que in quinque dividitur partes)*

1284 [Ad Her] comm (E - I 7-4.13) ff.187r-205v (anon; *quoniam, iudices, maioribus vos causis occupatos esse videam)*

**Escorial e III 19 xiv-xv**

1287 Ad Her ff.237-275

1288 [Ad Her] s-gl

**Escorial f IV 18 xii-xiii**

1289 [De inv] acc ff.1r-v (anon; *materia cuiuslibet artis generaliter est quod operatur artifex secundum ipsam)*

1291 De inv f.2-75

1293 [De inv] s-gl

1295 Ad Her ff.76-136

1297 [Ad Her] s-gl

**Escorial g IV 20 xiv-xv**

1302 Ad Her 91 fols

1304 [Ad Her] s-gl

**Escorial L III 13 xi**

1309 De inv ff.1-63

**Escorial N III 23-I xii**

1314 Ad Her (incompl) ff.1-31v [-39] (*videtur oppugnari* … [I 3.5])

1316 [Ad Her] m-gl (Guillelmus? *etsi negotiis familiaribus. cum Tullius de quinque partibus rethorice se tractaturum promiserat*)

1318 [Ad Her] s-gl (saec. **xiv)**

**Escorial Q.I.14 xiv**

1320 De inv extr. ff.109ra-vb

**Escorial S I 18 xiii**

1323 De inv ff.2-37ra

1325 [De inv] s-gl

1327 Ad Her ff.37ra-72ra

1329 [Ad Her] s-gl

**Escorial T II 12 xv**

1334 De inv extr (I) trans-span* (Castilian) 45 fols (title: *Libro de Marcho Tullio Ciceron que se llama de la retorica*)

1335 [De inv extr (I)] s-gl

**Escorial T III 18 xv**

1339 Ad Her ff.165-235

1340 [Ad Her] s-gl

**Escorial T III 23 xiii**

1344 De inv ff.50-97

1346 [De inv] mi/s-gl

1348 Ad Her ff.97-133

1350 [Ad Her] s-gl

**Escorial V III 11 xv**

1355 De inv ff.2-85

1357 [De inv] - s-gl (ff.1v-)

1359 [Ad Her] comm (E - I 1-16) ff.86-93v (anon; *ad honorem Domini rethorice pro longitate evitanda volo dicere dumtaxat quatuor verba et inter hec verba // et hoc volens demostrare Cicero primo ponit prohemium secundo exequitur, quantum ad partem prohemialem ac captat benivolenciam a parte sua*

1361 Ad Her ff.97-234

1363 [Ad Her] mi/s-gl

**Escorial V III 19 xv**

1367 Ad Her n f.1r

1368 Ad Her ff.2-38v

1369 [Ad Her] s-gl

**Évreux Bibl.Mun. 54-I xii**

1373 De inv extr (II 159) f.1 (*virtus est animi habitus nature modo atque ratione consentaneus*)

c ontains verses, Petrus Pictor *De sacra eucharisti*, Seneca *epp.,* Hildebert *carmina* and biblical *epigrammata*, Biblical frgs, Petrus Riga *Floridus aspectus* etc.

**Fabriano Bibl.Comunale 12 xvii**

1378 [De inv] cn item 8 (9 fols) (Gian Battista Barlozzi; *ex primo rhetorice libro. quid est rhetorica? est vel ars, vel doctrina dicendi. quid est ars? est que dat rationes curtas faciendi aliquid. quid est dicere? est ornare graviter, et copiose loqui*)

**Fagagna (Udine)**

**Archivio Parrocchiale di Fagagna busta s.n, "Fabbrica chiesa di San Giacomo apostolo" xiv-xv** (see *Quaderni Guarneriana* 8 [1984])

1383 Ad Her extr (IV 52.65) 1 fol (frg r and v) (*non desinis inquit uxor loqui)*

1385 [Ad Her] mi-gl (?) ('audivi a magistro [?] Gasparino die XXVI aprilis')

**Fermo Bibl. Comunale 16 x**

1390 De inv extr f.1r (*huiusmodi necessitudines cum in dicendi rationes incident* [II 57.170])

## 1392 De inv ff.6v-57

1394 [De inv] s-gl

1396 [De inv] comm ff.57v-154 (Victorinus)

**Ferrara Biblioteca Civica 14 (143)** [Procacci] xv [note: the staff of the Bibl. Civ. told me 1986 that they have no MSS of Cicero. Procacci's numbers (G.Procacci 'Index codicum Latinorum classicorum qui Ferrariae in Civica Bybliotheca adservantur' *Studi Italiani di Filologia Classica* 19 [1912] pp.34, 42-46) would in any case be incorrect for this library which precedes its MSS by the letters MS to indicate the room in which they are kept. The Procacci numbers do not match either the numbers in Mazzatinti / Sorbelli *Inv. dei MSS delle Bibl. d'Italia* v.LIV, 1933 (=Ferrara) or the 1884Catalogue of Antonelli (*Indice dei Manoscritti della Civica Biblioteca di Ferrara*, Ferrara 1884), all of whose MSS are preceded by the letter 'N', or the handwritten *Cat. dei MSS della Collezione Antonelli* available in the library itself, or the *Catalogo dei MSS di G.A.Scalatrini conservati presso la Biblioteca Comunale Ariostea di Ferrara e loro descrizione* by Alessandro Chiappini (= 'estratto' from *Atti e Memorie della Deputaz. Prov. Ferrarese di Storia Patria* ser. 3, vol.25, 1978).

1401 Ad Her 77 fols

**Ferrara Biblioteca Civica 29 (207) [Procacci] xv**

1406 Ad Her 227 fols

**Ferrara Biblioteca Civica 32 (245) [Procacci] xv**

1411 Ad Her 69 fols

1413 [Ad Her] s-gl

**Ferrara Biblioteca Civica 37 (350) [Procacci] xv**

1418 Ad Her ff.1-42v

1420 [Ad Her] s-gl

**Firenze Biblioteca dell'Academia Toscana di Scienze e Lettere 'La Colombaria' [Firenze, Via S.Egidio, 21-23, formerly La Società Colombaria (Fiorentina): POKk p.406] 236 [formerly II II II 2] xv**

1423 Ad Her 79 fols (POK *Iter* I)

**Firenze Biblioteca Medicea Laurenziana (=BML).**

[I have adopted an approximately alphabetical order for the various classes of MSS and 'fondi' (POKk 410-14), following presentation of the major 'plutei' MSS as listed in Bandinius*Cat.Cod.Lat.Bibl.Med.Laur*. vols I-III 1774-76 (POKk 409). This is different from the listing in POKk, which is: Bandinius*Cat.Cod.Lat.Bibl.Med.Laur*. 5 vols 1774-1778: plutei MSS, Laur.Gadd., Sta Croce I Sin.1 - XXXVI Dext.13, Italian MSS; Bandinius *Leopoldina* 3 vols 1791-93: S.Croce, Aedilium, Fratrum Minorum de Nemore, Monte Amiata, Gaddi, Segni, Biscioni, Strozzi, Fiesole, Mediceo-Palatini; Fondo Conventi Soppressi; Fondo S.Marco; Fondo Redi, Tempi, Rinuccini; Fondo Ashburnham; Fondo Acquisti e doni (listing only the classes from which MSS are listed below)]

**Firenze BML Plut.23.9 xv**

Mistake (Mattmann p.182) for Firenze BML Sta Croce Plut.23 sin.9 xv, which see.

**Firenze BML Plut.37.25 xv**

1425 Ad Her extr (IV 13.18- end) ff.55-69v (*dignitas est*  - M125.1, Ad Her IV 13.18)

1427 [Ad Her] s-gl

**Firenze BML Plut.38.21 xv**

1432 Ad Her extr ( M134.21 - 135.10, Ad Her IV 19.26) f.17r-v (*membrum orationis)*

**Firenze BML Plut.43.7 xv**

1437 Ad Her trans/para-ital* ff.49-72 (Fiore di retorica / Bono Giamboni / Speroni redaction delta; *comincia questo libro dicerti amaestramenti dati dadicitori chevoglio parlare comparola buona eordinata // per manifest[ar]e ragioni pruovano isaui phylosaphy chescripsero dottrina diparlare* [Speroni 1994 p. XCI])

check / correct assignment in survey ch. 4(a)

**Firenze BML Plut.43.19 xv**

1442 Ad Her trans/para-ital* ff.1-25va (Fiore di retorica / Fra Guidotto / Speroni redaction alpha etc. *considerando chome luomo pe\r/lauretude cheglie data daddio nella linghua disapere avanza tutte le bestie* [Speroni 1994 p.C])

1444 De inv trans/para/comm-ital* ff.39-82 (Brunetto Latini *qui comincia lo 'nsegnamento di rettorica // sovente e molto ò io pensata* *//* *rettorica èe scienzia di due maniere* [Holloway p.33])

**Firenze BML Plut.43.27 xv**

1446 Ad Her trans/para-ital* ff.1-65v (Fioretto della rettorica / Nuova Fiore di Rethorica, late redaction of 'Fra Guidotto' Fiore di retorica *in questo libro si tracta della doctrina e degli amaestramenti che sono dati* [Speroni 1970 pp.8-9])

**Firenze BML Plut.46.3 date?**

1449 Ad Her trans/para-ital* *(qui inchomincia certo trattato di rettoricha in volchare // nel sesto dì, poi che Iddio chomincò yl mondo a ffar e le creature* [Speroni 'Intorno' p.25 n.2 'un secondo']; Cox p.158 no.9)

**Firenze BML Plut.47.15**

Not relevant; probably a mistake for Plut.47.15. ?? indeed, but what then is Plut.47.15??? 47.35 maybe?

**Firenze BML Plut.47.35 xv**

1454 [Ad Her E] exord ff.182v-195v (Barzizza; *nisi persuasum haberem iudices*)

**Firenze BML Plut.48.15 xv**

1459 Ad Her ff.12-91v.

1461 [Ad Her] mi-gl (Guarino da Verona; *solebant maiores nostri in exponendis libris queque extrinseca et intrinseca sive quedam ad esse*)

**Firenze BML Plut.50.1 xiii**

1466 Ad Her ff.1-24rb

1468 [Ad Her] m-gl (anon; *nunc de arte extrinsecus: est ad artem intrinsecus veniendum. et est primo facienda divisio*)

1470 De inv ff.24va-54vb

1472 [De inv] m/mi-gl (*sepe et multum: annpofora [= anaphora?] est, posset aliquis* *dicere, tum intendis scribere de arte dicendi)*

1474 [De inv] comm (E - I 24) ff.28v-29 (Menegaldus? *si tam agentis persone quam rei geste)*

**Firenze BML Plut.50.2 xv**

1479Ad Her ff.1-41v

1481 [Ad Her] s-gl

1483 De inv ff.41v-80

1485 [De inv] s-gl

**Firenze BML Plut.50.3 xv**

1487 Ad Her ff.1-102

1489 [Ad Her] s-gl

**Firenze BML Plut.50.5 xiv**

1497 Ad Her 111 fols

1499 [Ad Her] s-gl (anon; *quotuplex est otium triplex scilicet iconomicum, polliticum et eticum; iconomicum versatur circa regimen familie, polliticum versatur circa regimen civitatis, eticum verum de moribus pertractat*)

**Firenze BML Plut.50.7 xii**

1504 De inv ff.1-55

1506 [De inv] s-gl

1508 Ad Her ff.55v-111

1510 [Ad Her] s-gl (f.89r: 'sum Lanfrancus de Rangonibus cum Guidone de Guidonibus')

**Firenze BML Plut.50.8 xv**

1515 De inv ff.1-87

1517 Ad Her 87v -169v ('liber Petri de Medicis Cos. F')

**Firenze BML Plut.50.9 xv**

1522 De inv 104 fols

**Firenze BML Plut.50.10 xi-xii**

1527 De inv ff.1v-35

1529 [De inv] mi/s-gl

1531 Ad Her ff.35v-69

1533 [Ad Her] s-gl (Odalricus? *Tulius hunc librum scribit rogatu amici sui Herenii Nasonis* [= MS Trier 1082 f.157r])

**Firenze BML Plut.50.11 xv**

1538 De inv 65 fols

1540 [De inv] s-gl

**Firenze BML Plut.50.12 xi**

1545 De inv ff.1-18v, 18v-19v

1547 [De inv] s-gl

1549 [De inv] comm ff.20-55, 57-75v (Victorinus)

1551 [De inv] comm (E - I 34-41) ff.55vb-57r (anon *cum sint undecim adtributa*.)

**Firenze BML Plut.50.13 xv**

1556 De inv 76 fols

1558 [De inv] s-gl

**Firenze BML Plut.50.15 xii**

1563 De inv ff.1-54v

1564 [De inv] s-gl

1567 Ad Her (incompl - to II 24.37 only) ff.55-74v

1568 [Ad Her incompl] s-gl

**Firenze BML Plut.50.16 xv**

1574 De inv ff.1-97

1575 [De inv] s-gl

1576 Ad Her ff.98-195

1577 [Ad Her] s-gl

**Firenze BML Plut.50.17 xiv**

1581 De inv ff.1-75

1583 [De inv] s-gl

1585 [De inv] comm (E) ff.75v-76v (Menegaldus? *si tam agentis persone quam rei geste*)

**Firenze BML Plut.50.20 xi**

1590 De inv ff.1v-33

1592 [De inv] mi-gl (anon; Grillius? *Grillius. notandum quia in hoc principio utitur Tullius defensione sed non aperta ne quia a tantis viris rethorica fuerat accusata favorem non mereretur sed odium)*

1594 Ad Her ff.34-65v

1596 [Ad Her] s-gl

**Firenze BML Plut.50.22 xv**

1601 De inv ff.86-150

**Firenze BML Plut.50.23 xv**

1606 De inv ff.1-56v

1608 [De inv] s-gl

1610 Ad Her extr (to I 2.2, M2.13) f.56v

**Firenze BML Plut.50.26 xii**

1617 De inv ff.1-71

1619 [De inv] s-gl

1621 Ad Her ff.71v-138v

1623 [Ad Her] s-gl (anon; *triplex est negocium, scilicet politicum, ethicum, yconomicum. Politicum est quo regimus rem publicam, eticum quo regimus nos ipsos, yconomicum quo regimus familiam)*

**Firenze BML Plut.50.27 xiii**

1628 De inv (CTc) ff.1ra-35ra

1630 [De inv] comm (CTc) ff.1ra-35ra (Victorinus)

1632 comm (E - I 34-41) ff.35ra-va (anon*cum sint XI attributa*. *persone quibus approbatur)*

**Firenze BML Plut.50.28 xv (1450-60)**

1637 Ad Her 90 fols

**Firenze BML Plut.50.29 xii**

1642 De inv ff.1-47

1644 [De inv] s-gl

1646 Ad Her ff.47v-91v

1648 [Ad Her] s-gl

**Firenze BML Plut.50.30 xii**

1653 De inv extr (II 45.130 to end) ff.1-8v (*prima pars his* [S135b.3])

1655 Ad Her (incompl - to M146.11) ff.9-48v (ff.49-55, still incompl [to M163.22] = later addition).

1657 [Ad Her] s-gl

**Firenze BML Plut.50.34 xv**

1662 Ad Her 69 fols

with glosses?

**Firenze BML Plut.50.39 xv**

1667: not relevant; = printed bookcontaining De inv and Ad Her.

**Firenze BML Plut.50.40 xiv (-xv)**

1672 Ad Her ff.1-87v (fols 37-87v = text completed by early modern humanist hand imitating print)

1674 [Ad Her] s-gl (anon; *rethorica est oratio bene dicendi et iurisperitorum quo propter nitorem et copiam loquentie maxime in civilibus questionibus necessaria est)*

**Firenze BML Plut.50.41 xv**

1679 Ad Her 56 fols

1680 [Ad Her] s-gl

**Firenze BML Plut.50.43 xii**

1686 De inv ff.1-42

1688 [De inv] s-gl *(civitas est collectio hominum et multitudo ad iure vivendum* [=Victorinus, Halm 158.12])

1690 Ad Her ff.42v-86

1692 [Ad Her] s-gl

**Firenze BML Plut.50.44 xii**

1697 De inv ff.1-81v

1699 [De inv] s-gl

1701 [De inv] comm (E - I 24) ff.81v-84 (Menegaldus? *si tam agentis*)

1703 Ad Her ff.84-160

**Firenze BML Plut.50.45 x**

1708 De inv ff.1-32v

1710 [De inv] s-gl

1712 [De inv] comm ff.33-86v (Victorinus with scribal headings and glosses and a few later glosses, xiv)

1713 [Victorinus] mi/s-gl

1714 comm (E - I 34-41) ff.86v-88v (anon; *cum sint undecim adtributa*.)

1715 [De inv comm - Victorinus] ta-rhet ff.88v-90

**Firenze BML Plut.51.10-III xi**

1719 [Ad Her] ta ff.50r-v (=Munk Olsen 52r-53r)

1721 Ad Her ff.51-81

**Firenze BML Plut.71.4 xiv**

1726 [Ad Her] comm ff.6-69va (Alanus; *omnium artium doctrinam duplicem esse secundum preceptum sententiamque Varronis Victorino teste // tractaturus Tullius doctrinam rethorice artis integram atque perfectam prohemium premittit)*

**Firenze BML Plut.76.64 xv**

1731 Ad Her trans/para-ital* (E - IV 13.19 - 54. 67) ff.66-74 (Scolari p.219: 'Trattatello di colori rettorici'; *vogliendo dimostrare a.tte, Agnolo amico, alcuna particella del bello parlare rettorico il quale a' suoi amanti dona graziosi benefici*)

**Firenze BML Plut.90 sup.65 xv**

1736 De inv extr (S1b.12-2b.5) f.116r (*tum facilius eloquentia*)

**Firenze BML Plut.90 sup.83 xv**

1741 Ad Her 82 fols

**Firenze BML Plut.90 sup.84 xv**

1748 Ad Her extr/abr (M2.5+) ff.1-13 (*oratoris officium est*)

**Firenze BML Plut.90 sup.86 xiv (+xv)**

1753 Ad Her ff.15-63

1755 [Ad Her] s-gl

**Firenze BML Plut.90 sup.87 xiii**

1758 Ad Her ff.1-59

1760 [Ad Her] m-gl ff.1-59v (Alanus; *omnium artium doctrinam duplicem esse secundum preceptum sententiamque Varronis Victorino teste // tractaturus Tullius doctrinam rethorice artis integram atque perfectam prohemium premittit)*

**Firenze BML Plut.90 sup.88 xv**

1765 De inv ff.1-43

1767 [De inv] s-gl

1769 Ad Her ff.44-82

1771 [Ad Her] s-gl

**Firenze BML Plut.90 sup.98 xv**

= mistake for Plut.90 sup.88

**Firenze BML Plut.91 sup.23 xv**

1776 [Ad Her E] exord ff.130-33 (Barzizza; *nisi persuasum haberem iudices vos ea virtute*)

**Firenze BML Acq. e doni 111-114 (one vol., the De inv portion being numbered 112) xvi**

1783 [De inv incompl - to S155b.21 valere] s-gl ff.1-14v [the modern through-the vol. pagination for this is 20-26v] (Accolti; *huius operis meminit in prohemio primi de oratore ubi dicit hec 'adolescentibus nobis ex commentariolis nostris incohanda atque rudia exciderunt'* [cf. Cicero De or. I 2.5])

**Firenze BML Acq. e doni 120-I xii** [Munk Olsen I p.173: '120-I and -II: '2 éléments contemporains et contemporaines, chacun ayant son propre système de signatures'; possibly in the original volume the *De inv* came first]

1788 Ad Her ff.1-57v`

1789 [Ad Her] s-gl

**Firenze BML Acq. e doni 120-II xii [see note on 120-I]**

1793 De inv ff.60-117v

1794 [De inv] s-gl

**Firenze BML Acq. e doni 335 xv**

1798 Ad Her ff.1-74v

1800 [Ad Her] s-gl

**Firenze BML Acq. e doni 381 xv**

1805 De inv (incompl - ends S156.6) ff.1-103

1807 [De inv] s-gl

**Firenze BML Acq. e doni 391 xiii**

1812 Ad Her ff.1-33

1814 [Ad Her] s-gl

**Firenze BML Acq. e doni 404 xv**

1819 Ad Her trans/para-ital* ff.1-31 (Fiore di retorica / Fra Guidotto / Speroni redaction alpha etc. *qui comincia la rethorica nuova di Tulio // nel tempo che segnoreggiava lo grande // acciò che la vita è corte* [Speroni pp.8-9, 15; for actual text of these incipits see Speroni 1994 p.CXI])

**Firenze BML Acq. e doni 413 xv**

1824 Ad Her ff.1-112

**Firenze BML Aedil. [=Edili] 206 xv**

1829 De inv ff.1-44

1831 [De inv] s-gl

1833 Ad Her ff.44v-87

1835 [Ad Her] s-gl

**Firenze BML Ashburn. 175 xiv**

1840 De inv extr (II 53-59) ff.1-4 (*eius initium est a[b] natura* [S148b.4-5])

1842[De inv extr] s-gl

1844 Ad Her ff.4v-64v

1846 [Ad Her] s-gl

**Firenze BML Ashburn. 196 xv**

1851 [Ad Her] inaug ff.8v-12 (Guarino da Verona; *per hos dies cum orationum illud et prudens et utile preceptum comparare poteritis* [Müllner p.286])

**Firenze BML Ashburn. 250 (182) xiii-xiv**

1856 De inv extr (S148b.4 - end) ff.1-4 (*eius initium* [S148b.4])

1858 [De inv extr] m-gl, **xiv** (*data descriptione ostendit quas partes habeat iusticie, i.e. iuris // leviter tractum a natura dicit quia naturale erat i.e. profectum a natura sed* [= hole in parchment])

1860 Ad Her ff.4v-64v

1862 [Ad Her] s-gl (anon; *incipit nova rhetho[rica] vel secunda vel minor; dicitur in VI libris. negotium sicuti omnis res civilis aliud publicum, aliud privatum // circa artem rhethorice considerandum sunt hec primo, quid sit rethorica, quod genus eius*)

**Firenze BML Ashburn. 570 (501) xiv (1390)**

1867 Ad Her trans/para-ital* (extr) ff.1-2 (Fiore di retorica / Fra Guidotto / *considerando come lohomo per la virtude chelie data da dio nella lingua disapere favellare avança tucte le bestie* [Speroni redaction beta etc; Speroni 1994 p.XCIX])).

**Firenze BML Ashburn. 906 xiv**

1869 Ad Her trans/para-ital* (?)

**Firenze BML Ashburn. 975 xiv**

1872 Ad Her trans/para-ital* ff.1-95v (Fioretto della rettorica / Nuova Fiore di Rethorica, late redaction of 'Fra Guidotto' Fiore di retorica *in questo libro si tracta della doctrina e degli amaestramenti che sono dati* [Speroni 1970 pp.37-38])

**Firenze BML Ashburn. 1020 xiv**

1877 Ad Her trans/para-ital* (? 'Trattato de rethorica estratto da Cicerone e da altri autori')

**Firenze BML Ashburn. 1049 xiv**

1882 Ad Her ff.1-42

1883 [Ad Her] s-gl

1884 De inv ff.43-87

1885 [De inv] s-gl

**Firenze BML Ashburn. 1050 xv**

1886 De inv incompl ff.8-42

1887 Ad Her 42v-91

**Firenze BML Ashburn. 1193 xiv**

1888 Ad Her 65 fols

1889 [Ad Her] s-gl

**Firenze BML Ashburn. 1726 xiv**

1892 Ad Her ff.1-66v

1894 [Ad Her] s-gl (Alanus? ['the attribution to Salutati's library is ... a bit doubtful ... the annotations are related to but independent of the 'Alanus' commentary which originated in France in the twelfth century, as Professor Harry Caplan kindly informs me': B.L.Ullman *The Humanism of Coluccio Salutati* Padova 1963 p.166)

**Firenze BML Conv. Soppr. 18 xiii**

1899 De inv ff. 1v-40v

1900 [De inv] s-gl

1901 Ad Her ff.40v-77v

1902 [Ad Her] s-gl

**Firenze BML Conv. Soppr. 61 xv**

1906 Ad Her 82 fols

**Firenze BML Conv. Soppr. 67 xiv**

1911 Ad Her (incompl - lacks beg. and end of all bks exc. end of IV) 41 fols (-*cisum conspicatur corpore telum cruentum* [Ad Her I 11.18, M15.1-2])

1912 [Ad Her incompl] s-gl

**Firenze BML Conv. Soppr. 539 xv (1476)**

1916 Ad Her 92 fols

1918 [Ad Her] s-gl

**Firenze BML Conv. Soppr. 543 xv**

1923 Ad Her 84 fols

1924 [Ad Her] s-gl

**Firenze BML Edili: see Firenze BML Aedil. (= Aedilium)**

**Firenze BML Faesulani: see Firenze BML Fies.**

**Firenze BML Fies. 186 xv**

1928 Ad Her ff.365-397v

1930 [Ad Her] s-gl

1932 De inv ff.398-430 (title: 'Rethoricorum contra Hermagoram libri')

1934 [De inv] s-gl

**Firenze BML Fiesolani: see Firenze BML Fies.**

**Firenze BML Fiesole: see Firenze BML Fies.**

**Firenze BML Gadd. 40 xii**

= mistake (Mattmann p.178): NRW

**Firenze BML Gaddiani (Fondo Gaddi): see Firenze BML Gadd.**

**Firenze BML Gadd. 65 xv**

1939 Ad Her trans/para-ital* ff.1-77 (Fiore di retorica: 'redazione, piuttosto tarda' del Fiore di retorica of Fra Guidotto [Maggini], 'un compendio o rifacimento della rettorica ad Erennio', 'correzioni o emendazioni o complemento della redaz. guidottiano' [Tocco *Il fior di Rettorica* (Speroni 1970 n.9)], 'a later vulgarisation', 'il testo resta anonimo' Speroni 1970 p.39) *in questo libro si tratta della docttrina e delli amaestramenti // avegna die che lanatura // posto di sopra alchuno preambulo ad invitare gli animi delli uditori*)

**Firenze BML Gadd. Plut. 89 sup. 27B xv**

1944 [Ad Her] inaug ff.128r-v (Guarinoda Verona; *quam liberalis* *et benefica* [Müllner p.296])

**Firenze BML Med.- Pal. 109 xiv (1367)**

1946 Ad Her 53 fols (Bandinius III [1793] cols 301-02 gives from 'pag.1' the colophon: 'Marci Tulli Ciceronis Arpinatis Romanae eloquentiae Principis ad Herennium Liber novae praeceptionis Rhetoricae feliciter explicit in civitate Parisia MCCCLXVII die XVII Augusti per Franciscum Florium [Florentinum] scriptus. Deo gtratias. Amen'; the Juvenal portion of the MS was written by the same scribe and dated to the same year: '(die) XXVIII Augusti in vigilia Augustini Sancti perscriptus')

**Firenze BML Red. 23 xv**

1950 Ad Her trans/para-ital* ff.1-91v (Fiore di retorica / Bono Giamboni / 'the "giambonian" redaction is more ordered and correct than the "guidottian" ' [Tocco], redaction delta of the Fiore 'redattore ne fu certamente Bono Giamboni' [Speroni 1970; Speroni 1994 p.LXXXVI, supplying incipits from MS 'C1', i.e. BNC II.II.90 (Speroni 1994 p.LXXXIV)] *questo libro tratta deglamaestramentj dati dadicitori chevoglon parlare con parola buona composta ordinata e ornata. einsuleproposte sapere consiglare. il detto suo piaceuolemente profferere. recato acerto ordine per messer Bono giambonj. adutilita dicoloro acui piacera dilegger involgare e comincia il prologo // per manifeste ragioni prouano isavi filosofi che scrissero doctrina diparlare*)

1952 De inv trans/para-ital* (extr. - to Maggini p.19 line 17 'come bestie') ff.121-133v (Brunetto Latini; *qui comincia // sovente e molto // rettorica èe scienzia di due maniere* [Holloway p.33; Cox p.158 no.12.2])

**Firenze BML Red. 108 xv (1453)**

1954 De inv ff.1-102 (title: 'Deo laus finis rhetorice veteris 1453 die XXIX Novembris')

1956 [De inv] mi/s-gl *(nam quid sit in principiis* *uniuscuiusque orationis deliberandum, i.e. ut auditores faciat attentos)*

**Firenze BML Redi (Fondo Redi): see Firenze BML Red.**

**Firenze BML San Marco 173 xi**

1960 [De inv] comm (E - frg from incipit) f.6r (Grillius; *incipientes quamcumque rem scribere antequam scribamus eam commendare debemus, ut Virgilius* [ed. Martin p.1])

**Firenze BML San Marco 278 xiv**

1970 Ad Her ff.1-81

1972 [Ad Her] s-gl (anon; ocium uno modo dicitur vacatio in rebus temporalibus alio modo vacatio ab omni operatione)

**Firenze BML Santa Croce: see Firenze BML Sta Croce**

**Firenze BML Segni 8 xv**

1977 Ad Her trans/para-ital* ff.1-77 (Fiore di retorica: 'redazione, piuttosto tarda' del Fiore di retorica of Fra Guidotto [Maggini], 'un compendio o rifacimento della rettorica ad Erennio', 'correzioni o emendazioni o complemento della redaz. guidottiano' [Tocco], 'a later vulgarisation' 'il testo resta anonimo' [Speroni 1970 pp.38-39, 1973 p.28] *in questo libro si ratta della docttrina e delli amaestramenti // avegna die che lanatura // posto di sopra alchuno preambulo ad invitare gli animi delli uditori*)

check / correct assignment in survey ch. 4(a)

**Firenze BML Sta Croce Plut.23 sin.9 xv**

1982 De inv ff.1-67

1986 Ad Her ff.68-144

**Firenze BML Strozz. 38 xii**

1991 [Ad Her] acc f.1v (Willelmus? *cum de quinque partibus rethorice artis Tullius in principio primi libri superius se tractaturum premisisset et prima parte* [= reworded version of incipit to commentary found also elsewhere, e.g. MS Alba Julia II.77 fols.81-114v])

1993 Ad Her (incompl - lacks end) ff.2-49

1995 [Ad Her ] m-gl (Guillelmus? [*etsi cum Tullius*])

**Firenze BML Strozz. 40 xii**

2000 De inv ff.1-46v

2002 [De inv] mi-gl

2004 [De inv] s-gl (**xiii?**)

2006 [Ad Her] acc f.46v (anon; *circa hanc artem hec extrinsecus sunt consideranda, quid sit ars, que materia, quod officium, quis finis, quod genus, que species, que partes, cuius artifex, quod instrumentum, qualiter docenda et discenda, quare hoc vocabulum [?] censeatur*)

2008 Ad Her ff 47-86

2010 [Ad Her] mi-gl

2012 [Ad Her] s-gl (**xii-xiii?**)

**Firenze BML unlocated:**

Laurentius Mediceus Inv. 162 (quinta capsa) 540: De inv (Mattmann p.183)

Laurentius Mediceus Inv. 211 (sexta capsa) 446: De inv (Mattmann p.183)

Not included in survey ch. 4(a)

**Firenze Biblioteca Moreniana** [listed as independent library in POKk p.414, but in earlier editions, the 'new edition, revised', Fordham University Press 1960 p.107 (and same page in 3rd edition 1965) it is listed as 'annexed to the Riccardiana', where I inspected it in 1975, and where it still is (2004)] Frullani 6 xiv

2020 Ad Her (lacks end) 98 fols

2022 [Ad Her] s-gl (anon; *retorica est scientia dicendi apposite ad persuadendum; sic rectorica est potentia dicendi*)

**Firenze Biblioteca Nazionale Centrale (=BNC).**

[The order of presentation follows that adopted in POKk pp.414-20, viz. *Fondo Principale* (or *Fondo Nazionale*); *Fondo Magliabechiano* (henceforth 'Magl'. - for those MSS without a Fondo Principale number, i.e. not in Mazzatinti *Inventari* VII-XIII); *Fondo Palatino* (to which have been annexed the *Panciatichiani* MSS); *Fondo Conventi Soppressi; Fondo Landau Finaly; Fondo Nuovi Acquisti* - only those fondi from which MSS are to be found in the present collection are listed here]

**Firenze BNC Fondo Princ.II.I.67 [= Magliabechiano (henceforth 'Magl'.) VI, 25] xv**

2040 [Ad Her] comm ff.1-179v (Guarino da Verona [title: 'commentarii in Rhetorices Ciceronis sub Guarino collecti incipiunt']; *solent qui exponendorum scriptorum negotium susceperunt nonnulla extrinsecus preponere deinde textum ipsum // nunc ad prohemium veniatur quod tanquam corpori caput preponitur. eius autem effectus esse debent tres quemadmodum in preceptis artis traditur)*

2042 [Ad Her E] exord ff.245-65 (Barzizza; *exempla exordii quando habemus dubium genus cause // [n]isi persuasum haberem iudices)*

**Firenze BNC Fondo Princ. II.I.68 [Magl. VI, 24] xv**

2047 Ad Her trans/para-ital* ff.7-83v (*Fioretto della rettorica* / *Nuova Fiore di Rethorica*, late redaction of 'Fra Guidotto' *Fiore di retorica* [Speroni 1970 pp.37-38; title: 'extracti dello rettoricha nuova di Tulio Romano']; *in questo libro si tracta della doctrina e degli amaestramenti che sono dati // vogliono sapere bene*)

**Firenze BNC Fondo Princ. II.I.71 [Magl. VIII, 1385; Strozzi, in-folio no. 545] xv**

2052 Ad Her trans/para-ital* ff.184-229

(*Fioretto della rettorica* / Nuova Fiore di Rethorica, late redaction of 'Fra Guidotto' *Fiore di retorica* [Speroni 1994 p.CXIV 'testo, mutilo, di un volgarizzamento più tardo della *Rhetorica ad Herennium*, di cui ho dato notizia in altra sede' (Speroni 1970 pp.37-38)]; *Antonio di Piero di Niccholaio di Manetto da Ffilichaia in dey nomine Amen. qui comincia l'ensengniamento della Rettoricha nuova di Marco Tullio // [ ]vengnia dio chella natura minisstrasse e desse alluomo molte proprieta per le quali facesse diferentia daesse allo animale bruto)*

2054 Ad Her trans/para-ital* ff.229-37 (Speroni 1994 p.CXIV: 'Il *Fiore di rettorica* è dato, in frammento, alle cc.229r-237r; Speroni 1970 pp.8-9, 15: in part 'redazione alpha' in part other redactions; *item perche chagione temesstj voi messere lopodessta*)

**Firenze BNC Fondo Princ. II.II.23 [Magl.VI, 21] xiv**

2059 Ad Her trans/para-ital* ff.72ra-124va (Fiore di retorica / Fra Guidotto / Speroni [1970] redaction gamma; Speroni 1994 pp.LXXI-VII; *[ ]ero che di rettoricha tracta / tare e lontendimento di questo libro)*

**Firenze BNC Fondo Princ. II.II.48 [Magl. ??? ] xv**

2064 De inv trans/para-ital* ff. (Brunetto Latini; Holloway pp.27, 33; Holloway *Twice-told Tales* pp.516, 525)

check / correct assignment in survey ch. 4(a)

**Firenze BNC Fondo Princ. II.II.90 - I [Magl. VI, 172; Strozzi, i-folio, 1404 (+ II = Magl. VI, 141; Strozzi, in-folio, 231 + III = Magl. VII, 954; Strozzi, in-folio, 215)]**

**xv (1425)**

2069Ad Her trans/para-ital* ff.1-32 (Bono Giamboni [Speroni 1994 LXXXIII-IV]; *questo libro tratta deglamaestramentj dati dadicitori chevoglon parlare con parola buona composta ordinata e ornata. einsuleproposte sapere consiglare. il detto suo piaceuolemente profferere. recato acerto ordine per messer Bono giambonj. adutilita dicoloro acui piacera dilegger involgare e comincia il prologo // per manifeste ragioni prouano isavi filosofi che scrissero doctrina diparlare*)

2071 [De inv E] trans/para-ital* ff.32-37 ('Questo testo, per quanto mi consta, è inedito': Speroni 1994 LXXXIV; *incominciano alquanti fiori cavati della rectorica di tulio delprimo libro che intitolato de arte veteri. e confassi conla materia disopra // tutte le cose sopra lequali consiglio sirende perparlare rettorio sissi riducono a tre ordini cioe. ordine iudiciale. e ordine dimostrativo. et ordine deliberativo*)

**Firenze BNC Fondo Princ. II.II.91 - I [Magl. VI, 170 (+ II = VII, 967)] xv**

2076De inv trans/para-ital* ff.1-33v (Brunetto Latini; Holloway p.32; Holloway *Twice-told Tales* p.516; ed. Maggini p.XXI)

**Firenze BNC Fondo Princ. II.IV.73 ['Magliabechiano' (Maggini XXI) = (Holloway *Twice-told Tales* p.516)** **Conv. Soppr. P.IV C 73 S.M.Novella 321] xiv [Maggini XXI] xv [Mazzatinti *Inventari* IX p.114 'S.Maria Novella (a.1809)']**

2081 De inv trans/para-ital* ff.1-43v (Brunetto Latini; Holloway p.32; ed. Maggini p.XXI)

**Firenze BNC Fondo Princ. II.IV.102 [Magl. XXI, 121, Strozzi in-folio 161, 'già 269 (Scolari p.219)] xv**

2085 Ad Her trans/para-ital* (E - IV 13.19 - 54. 67) ff.25-29v (Scolari 219: 'Trattatello di colori rettorici'; *vogliendo dimostrare a.tte, Agnolo amico, alcuna particella del bello parlare rettorico il quale a' suoi amanti dona graziosi benefici*)

**Firenze BNC Fondo Princ. II.IV.123 [Magl. VI, 146; (Cl.)VI, P.IV, 123] xiii-xiv**

2089 Ad Her trans/para-ital* ff.1-22 (*Fiore di rettorica:* 'Guidottiana' redaction, 'prima redazione (alpha)' [Speroni 1970 pp.8-9, 15]; *qui comincia la rectorica nuova di Tulio // nel tempo che signoreggiava*)

**Firenze BNC Fondo Princ. II.IV.124 [Magl. VI, 150] xiv**

2094 De inv trans/para-ital* 51 fols (Brunetto Latini; Holloway p.33; Holloway *Twice-told Tales* p.516; ed. Maggini p.XXII)

**Firenze BNC Fondo Princ. II.IV.127 [Maggini p.XXIII 'Maglabechiano' ([Cl.]VI P.IV.127); Speroni 1994 p.CIII: SS Annunz., a. 1809 (num.165); Holloway p.33 'Strozziano 146'; Conv. Soppr. P.IV C 127, SS Annunz. 1384; Mazzatinti *Inventari* X p.133-34 gives no Magl. no and only 'SS.Annunziata a.1809'] xiv**

2099 De inv trans/para-ital* ff.1-41va (Brunetto Latini; Holloway p.33; Holloway *Twice-told Tales* p.516; ed. Maggini p.XXIII)

3001 Ad Her trans/para-ital* ff.43-67vb (*Fiore di rettorica*: 'Guidottiana' redaction, 'prima redazione (alpha)' [Speroni 1970 pp.8-9, 15]; *qui comincia la rectorica nuova di Tulio // nel tempo che signoreggiava*)

3003 [Ad Her] trans/para-ital*] acc f.74ra (*prohemio percontinuare questa parte // in questo libro poco innançi eparte de la rethorica vecchia di tulio volgariçata per ser burnetto latini de firençe. eapresso lanova recthorica deldetto tulio volgariçata per frate Guidotto dabolongna* [falls between ital* 'proemi e esordi' ff.70va-73vb and 'capitoli sugli argomenti, volgarizzati dal *Tresor* [di Brunetto Latini] III.li-lxi, ff.74ra-80vb])

3004 [Ad Her] exord ital*

**Firenze BNC Fondo Princ. II.IV.130 [Magl. VI, 78; Gaddi num.715] xv**

3008 Ad Her trans/para-ital* ff.3-62 (*Fiore di rettorica*:: anon; a later volgarization 'already examined by Tocco and Maggini': Speroni 1970 pp.37-39; Maggini *I primi volgarizzamenti* [1943] 1952(Speroni 1970 n.14) pp.97ff, esp. p.98; *in questo libro si tratta della dottrina et degli amaestramenti che ssono dati a' dicitori*)

**Firenze BNC Fondo Princ. II.VII.155 xv (1468-69)**

3012 Ad Her ff.3-83

3014 [Ad Her] s-gl (anon; *rectorica pars civilis est philosophie // iste primus liber in duas dividitur partes in prohemialem et executivam*)

**Firenze BNC Fondo Princ. II.VIII.32 [Strozzi, in-4o, num.466; Magliab. VI, 192] xv**

3019 De inv trans/para-ital* (E - to '31.1 [Sponitore] '...tal che ciene ricordi quando' [Speroni 1994 p.CXII = ed. Maggini p.77 lines 30-4]) ff.3-37 (Brunetto Latini; Holloway p.33; Holloway *Twice-told Tales* p.516; ed. Maggini p.XXIV discussing the 'contaminazione' of 3019 by 3021)

3021 Ad Her trans/para-ital* (E - '43.3' Speroni 1994 p.CXII) ff.37-58 (*Fiore di rettorica*: 'Guidottiana' redaction, 'prima redazione (alpha)' [Speroni 1970 pp.8-9, 15]; *ornato o piu chiaro e aperto o piu aprovato omanifesto)*

**Firenze BNC Fondo Princ. II.VIII.42 [Magliab. VI, 188] xv**

3026 Ad Her trans/para-ital* 55 fols (title: 'Rettorica di cicerone ad Erennio'; Speroni 'Intorno' p.25 n.2 'terzo'; *advegna che per lo inpedimento de facende familiar;* Cox p.158 no.10)

**Firenze BNC Fondo Princ. II.IX.46 xv (1462)**

3031 Ad Her unnumbered fols (only work in MS)

**Firenze BNC Fondo Princ. II.IX.112 xv**

3036 Ad Her ff.1-50

**Firenze BNC Magl. VI, 3 xvii**

3041: [Ad Her] cn 29 fols

**Firenze BNC Magl. VI, 4 xvii**

3046 [Ad Her] acc (?) f.1-69v (anon [a sort of trivia work-book by one who was Italian and was studying Greek); *commentaria in libros rethoricorum. capit. primum. de nomine rhetorice. rhetorice vocabulum grecum est)*

**Firenze BNC Magl. VI, 20 xv**

3051 Ad Her trans/para-ital* (E - 'capitoli 1 e 82 del *Fiore di rettorica*'; Speroni 1994 p.LXXXII; Speroni 1970 pp.8-9, 25-30 'estrapolazione del proemio e del trattato sulla memoria' [Ad Her III 16.28 *et seqq.*]) ff.52-56v (Guidotto da Bologna, Bono Giamboni; *manifeste ragioni assegnano isavi phylosaphi iquali scripsono doctrina diparlare*)

**Firenze BNC Magl. VI, 25 xv**

3056 [Ad Her E] exord ff.246-65 (Barzizza)

**Firenze BNC Magl. VI, 79 [Gaddi 662] xv**

3061 Ad Her trans/para-ital* ff.1ra-45vb *Fiore di rettorica*' 'redazione gamma'; Speroni 1970 pp.8-9, 25; Speroni 1994 p.LXX; *manifeste ragioni assengnano lisavi filosafi che scrissero doctrina diparlare;* Mazzatinti *Inventari* XII p.136 gives this inc: *ora seguitarebe dell' exordio ch'è chiamato insinuatione, et poi de' vitii che avengono nelli exordii)*

3062[Ad Her] exord ital*

**Firenze BNC Magl. VI, 115 xv**

3066 Ad Her trans/para-ital* (E - IV 13.19 - 54. 67) ff.111-115v (Scolari p.218: 'Trattatello di colori rettorici'; *vogliendo dimostrare a.tte, Agnolo amico, alcuna particella del bello parlare rettorico il quale a' suoi amanti dona graziosi benefici*)

**Firenze BNC Magl. VI, 128 xv**

3076 Ad Her 70 fols

3078 [Ad Her] s-gl (anon; *incipit rhetoricorum liber M.Tul. Ciceronis ad Aticum amicum suum // tria sunt negotia: privatum, publicum et familiare*)

**Firenze BNC Magl. VI, 129 xv**

3083 De inv ff. 1-97

3085 [De inv] s-gl (anon: *Ciceronis rethorica ad Hermaghoram incipit // huius operis titulus est rethoricorum [libri?]*)

**Firenze BNC Magl. VI, 175 xiii (xii 2nd half: B.Munk Olsen *Revue d'histoire des textes* 21[1991] p.45)**

3089 De inv ff.1-56

3091 [De inv] s-gl

3093 [Ad Her] ta ff.56v-57

3095 Ad Her ff.57v-110

3097 [Ad Her] s-gl

**Firenze BNC Magl. XXI, 73 [Gaddi num. 733] xv**

4006 Ad Her trans/para-ital* (E - IV 13.19 - 54. 67) ff.67-71v (Scolari p.219: 'Trattatello di colori rettorici'; *vogliendo dimostrare a.tte, Agnolo amico, alcuna particella del bello parlare rettorico il quale a' suoi amanti dona graziosi benefici*)

**Firenze BNC Magl. XXI, 158 [Strozzi, in 4o, n.294] xv**

4011 Ad Her trans/para-ital* (E - 'capitoli 1 e 82 del *Fiore di rettorica*' - Speroni 1994 p.LXXX) ff.32-39 (*manifeste ragioni asegnano isavi phylosafi iquali scripsono dotrina diparlare*)

**Firenze BNC Palatino 54 xv**

4016 Ad Her trans/para-ital* (E - 'capitoli 1 e 82 del *Fiore di rettorica*' - Speroni 1994 p.LXXXII) ff.29-33v (incipit testus memorie artifitiose vulgariter Marci tullij Ciceronis. S super quadam partem rethorice // *manifeste ragioni assegnano isavi phylosaphi iquali scripsono dotcrina diparlare*)

**Firenze BNC Palatino 181 [248 - E, 5, 2, 53] xv**

4021 Ad Her trans/para-ital* ff.2-34 (*Fiore di rettorica* - redaction 'delta', 'la giamboniana' - Speroni 1970 pp.8-9, 30; Speroni 1994 p.LXXXVI; *questo libro tratta degliamestramentij datj dadicitorj chevoglion parlare chonparola buona // permanifeste ragionj prouano isavi filosafi chescrissono dottrina dj parlare*; POKk p.417 'Luigi Gentile *et al.'* I fasc. I p.187 says the treatise is preceded by a prologue of the translator *choloro che vogliono perfettamente sapere favellare ..*.)

4023 [De inv E] trans/para-ital* ff.32-37 (Speroni 1994 p.LXXXVII; 'Questo testo, per quanto mi consta, è inedito': Speroni 1994 LXXXIV; *incominciano alquanti fiori cavati della rectorica di tulio delprimo libro che intitolato de arte veteri. e confassi conla materia disopra // tutte le cose sopra lequali consiglio sirende perparlare rettorio sissi riducono a tre ordini cioe. ordine iudiciale. e ordine dimostrativo. et ordine deliberativo*)

**Firenze BNC Palatino 532 [185 - E, 5, 4, 4] xv**

4028 Ad Her trans/para-ital* ff.2-34 (*Fiore di rettorica* - redaction 'alpha', 'la prima redazione - Guidottiana' - Speroni 1970 pp.8-9, 15; Speroni 1994 p.CIX; *qui comincia laretorica nuova di Tulio traslata diggramatica involgare perfrate guidocto dabolongnia // neltenpo che singnorigiava ilgrande e gentile huomo Giulio cesare ilquale fu ilprimo imperadore di roma* // [POKk p.417 'Luigi Gentile *et al.'* II fasc. I p.90 adds: *acciò che lla. vita e corta e l'arte e lungha // coloro che volgliono ornatamente e piacevolmente sapere favellare).* See on MS Cox p.158 no.12.

**Firenze BNC Palatino 791 [586-21,2] xv**

4033 Ad Her trans/para-ital* (E - IV 13.19 - 54. 67) ff.43v-57v (Scolari p.219: 'Trattatello di colori rettorici'; *vogliendo dimostrare a.tte, Agnolo amico, alcuna particella del bello parlare rettorico il quale a' suoi amanti dona graziosi benefici*)

**Firenze BNC Palatino 1166 [1077 - 21,5] xvi**

4038 [Ad Her] comm (E - Ad Her I 1-2) ff.175-77v (POKk p.417 'Luigi Gentile *et al.'* III fasc. 5-6 p. 348: 'Marcello Adriani commenti a M.T.Cicerone'; *etsi negotiis familiaribus impediti etc. // ut consueverunt alii interpretes itidem* et *nos ante interpretationem contextus quaedam prolegomena)*

**Firenze BNC Palatino Panciatichiani 67 [50. - IV, 15] xiv**

4043 Ad Her trans/para-ital* ff.22-55vb (*Fiore di rettorica* 'Recthorica di Tullio Romano, 'redaction 'alpha', 'la prima redazione - Guidottiana' - Speroni 1970 pp.8-9, 15; Speroni 1994 p.XCVIII;

*[ ]eltempo chesengnoreggiava logrande egentiluomo Iulio Cesar, chavenne epoi loprimo imperadore diroma)*

**Firenze BNC Palatino Panciatichiani 147 (60) xv (late)**

4048 22r-v [De inv] acc ff.22r-v (title: 'de arte rethorica', #19 in POKk p.107 '- pt. VII' I, fasc 3 p.29; Lorenzo di Antonio Ridolfi de Florentia (the MS is his 'zibaldone', pupil of 'Magister Johannes de Montachiello'; *iam expedita prima parte huius presentis actus [? = 'artis'], deveniendum est brevissime ad secundam. est igitur more solito proquirendum post[t]quam tractaturi sumus de arte rectorice, quid sit rectorica et unde dicat, que intentio )*

4050 [De inv] comm (E - on De inv I 1-6) ff.23-31v (Lorenzo di Antonio Ridolfi, pupil of 'Magister Johannes de Montachiello'; title: 'M.T.C.Rectoricorum libri, I inc. Sepe et multum [etc.]; *habitis quibusdam que extra licteram requiruntur, deveniendum est ad formam tractatus, que libri divisio dicitur. dividitur ergo primaria divisione. liber hic in partes duas ut duo sunt libri. in prima. namque parte agitur de genere artis, officio et fine, et de materia et partibus. in secunda vero que argumenta in quibus constitutionibus et in quibus generibus causarum accomodum [=anda?] conveniat)*

**Firenze BNC Conv. soppr. J.I.47 [S.Marco di Firenze num.34] xv**

4055 Ad Her [E - III 16.28 et seqq, de memoria] trans/para-ital* ff.52-56v ('capitoli 1 e 82 del *Fiore di rettorica*; il testo si interrompe a 82.107 con le parole 'esenon molte overo [etc. - Speroni 1994 LXXXII]; Yates *Art of Memory* pp.98, 382; Bono Giamboni / Guidotto da Bologna; *manifeste ragioni assegnano isavi phylosaphi iquali scripsono doctrina diparlare*)

**Firenze BNC Conv. soppr. I.IX.34 [S.Marco di Firenze] xv**

4060 De inv ff.1-104

4062 [De inv] s-gl

4064 Ad Her ff.108-206

4066 [Ad Her] s-gl

**Firenze BNC Conv. Soppr. 1796 [S.Ma delle Selve C.7] xv (1448)**

4071 Ad Her ff.1-86, 87r-v (f.84v ends res multa M186.12; 85r begins praeteriens M188.18; 86r finishes text with 'explicit M.T.C. Rhetorice nove ad herennium liber quartus et ultimus 1448 die 17 mai Ferrara per me gualterum de hollandia et de delf'; f.86v blank; f.87r begins aut informis M186.13 and 87v ends suspicari M188.15, after which we find '1448' then M188.16 - Lemnum, thus completing the text; title: 'incipit primus liber rethoricorum Marci Tull. Ciceronis ad gayum herennium')

4073 [Ad Her] s-gl (Guarino? *negocium triplex est, scilicet politicum sive ethiocum vel monosticum. yconomicum est quando habetur circa familiam // nota docere rethoricam artem esse duplex, scilicet extrinsecus vel intrinsecus*)

**Firenze BNC Landau-Finaly 233 xv?**

4078 Ad Her trans/para-ital* ('Ad Her volgarizzamento': Speroni 'Intorno' p.25 n.2 'quarto'; Cox p.158 no.11)

check / correct assignment in survey ch. 4(a)

**Firenze BNC Nuovi acquisti 412 xv**

4083 Ad Her ff.1-36v (various owners, editors, scribes mentioned in MS: Marius; Antonius; Coluccius de Stignano; Marcus de Marcis [?] Nofrio de Stiog. onorandum [?] cittadinus borghi desantis [?]; Petrus Martinus Christi Bittinus [?])

4085 [Ad Her] s-gl (anon;*[phil]osophia dicitur quandoque dialetica inde [?] Priscianus philosophi diffiniunt vocem*)

4087 [Ad Her] cn (?) ff.60r-v (anon; see 4083; *orator est vir bonus dicendi peritus*)

**Firenze BNC Nuovi acquisti 419 xv**

4083 Ad Her 90 fols

4085 [Ad Her] s-gl
